# Supplementary material for: Preparation and characterisation of an equatorial para-adduct of (PhCH2)HC70 from the reaction of C702− with benzyl bromide and H2O: addition effects in the polar and equatorial regions of C70
Source: Royal Society of Chemistry journal article supplement (doi:10.1039/c1ob05809f), 2011-01-01
Supplement: c1ob05809f.pdf [file c1ob05809f.pdf]

## Supporting Information for

# Preparation and Characterisation of an Equatorial Para-adduct of (PhCH<sub>2</sub>)HC<sub>70</sub> from the Reaction of C<sub>70</sub><sup>2-</sup> with Benzyl Bromide and H<sub>2</sub>O: Addition Effects in the Polar and Equatorial Regions of C<sub>70</sub>

Ling Ni, Wei-Wei Chang, Hui-Lei Hou, Zong-Jun Li, and Xiang Gao\*

*State Key Laboratory of Electroanalytical Chemistry, Changchun Institute of Applied Chemistry,  
Graduate School of Chinese Academy of Sciences, Chinese Academy of Sciences, 5625 Renmin Street,  
Changchun, Jilin 130022, China*

xgao@ciac.jl.cn

## Contents

|                                                                                                                                                                                                                |    |
|----------------------------------------------------------------------------------------------------------------------------------------------------------------------------------------------------------------|----|
| Figure S1. UV-vis absorption spectra of 7,23-(PhCH <sub>2</sub> )HC <sub>70</sub> and 7,23-(PhCH <sub>2</sub> ) <sub>2</sub> C <sub>70</sub> recorded in toluene                                               | S4 |
| Figure S2. <sup>1</sup> H NMR spectrum of 7,23-(PhCH <sub>2</sub> )HC <sub>70</sub> recorded in CS <sub>2</sub> with acetone- <i>d</i> <sub>6</sub> as the external lock                                       | S5 |
| Figure S3. <sup>1</sup> H NMR spectrum of 7,23-(PhCH <sub>2</sub> )HC <sub>70</sub> recorded in CS <sub>2</sub> /CDCl <sub>3</sub>                                                                             | S6 |
| Figure S4. <sup>1</sup> H NMR spectrum of 7,23-(PhCH <sub>2</sub> )HC <sub>70</sub> recorded in CS <sub>2</sub> with DMSO- <i>d</i> <sub>6</sub> as the external lock                                          | S7 |
| Figure S5. <sup>13</sup> C NMR spectrum of 7,23-(PhCH <sub>2</sub> )HC <sub>70</sub> recorded in CS <sub>2</sub> with DMSO- <i>d</i> <sub>6</sub> as the external lock                                         | S8 |
| Figure S6. Expanded <sup>13</sup> C NMR spectrum for the sp <sup>2</sup> region of 7,23-(PhCH <sub>2</sub> )HC <sub>70</sub> recorded in CS <sub>2</sub> with DMSO- <i>d</i> <sub>6</sub> as the external lock | S9 |

|                                                                                                                                                                                           |     |
|-------------------------------------------------------------------------------------------------------------------------------------------------------------------------------------------|-----|
| Figure S7. DEPT HMQC NMR spectrum of 7,23-(PhCH <sub>2</sub> )HC <sub>70</sub> recorded in CS <sub>2</sub> with DMSO- <i>d</i> <sub>6</sub> as the external lock                          | S10 |
| Figure S8. HMBC NMR spectrum of 7,23-(PhCH <sub>2</sub> )HC <sub>70</sub> recorded in CS <sub>2</sub> with DMSO- <i>d</i> <sub>6</sub> as the external lock                               | S11 |
| Figure S9. Negative ESI FT-ICR MS of 7,23-(PhCH <sub>2</sub> )HC <sub>70</sub>                                                                                                            | S12 |
| Figure S10. <sup>1</sup> H NMR spectrum of 1,2-H(PhCH <sub>2</sub> )C <sub>70</sub> recorded in CS <sub>2</sub> /CDCl <sub>3</sub>                                                        | S13 |
| Figure S11. <sup>13</sup> C NMR spectrum of 1,2-H(PhCH <sub>2</sub> )C <sub>70</sub> recorded in CS <sub>2</sub> /CDCl <sub>3</sub>                                                       | S14 |
| Figure S12. Expanded <sup>13</sup> C NMR spectrum for the sp <sup>2</sup> region of 1,2-H(PhCH <sub>2</sub> )C <sub>70</sub> recorded in CS <sub>2</sub> /CDCl <sub>3</sub>               | S15 |
| Figure S13. Negative ESI FT-ICR MS of 1,2-H(PhCH <sub>2</sub> )C <sub>70</sub>                                                                                                            | S16 |
| Figure S14. UV-vis spectrum of 1,2-H(PhCH <sub>2</sub> )C <sub>70</sub> recorded in toluene                                                                                               | S17 |
| Figure S15. <sup>1</sup> H NMR spectrum of 2,1-H(PhCH <sub>2</sub> )C <sub>70</sub> and 5,6-H(PhCH <sub>2</sub> )C <sub>70</sub> mixture recorded in CS <sub>2</sub> /CDCl <sub>3</sub>   | S18 |
| Figure S16. <sup>13</sup> C NMR spectrum of 2,1-H(PhCH <sub>2</sub> )C <sub>70</sub> and 5,6-H(PhCH <sub>2</sub> )C <sub>70</sub> mixture recorded in CS <sub>2</sub> /CDCl <sub>3</sub>  | S19 |
| Figure S17. Uv-vis absorption spectrum of 2,1-H(PhCH <sub>2</sub> )C <sub>70</sub> and 5,6-H(PhCH <sub>2</sub> )C <sub>70</sub> mixture recorded in toluene                               | S20 |
| Figure S18. <sup>1</sup> H NMR spectrum of 7,23-(PhCH <sub>2</sub> ) <sub>2</sub> C <sub>70</sub> recorded in CS <sub>2</sub> /CDCl <sub>3</sub>                                          | S21 |
| Figure S19. <sup>13</sup> C NMR spectrum of 7,23-(PhCH <sub>2</sub> ) <sub>2</sub> C <sub>70</sub> recorded in CS <sub>2</sub> /CDCl <sub>3</sub>                                         | S22 |
| Figure S20. Expanded <sup>13</sup> C NMR spectrum for the sp <sup>2</sup> region of 7,23-(PhCH <sub>2</sub> ) <sub>2</sub> C <sub>70</sub> recorded in CS <sub>2</sub> /CDCl <sub>3</sub> | S23 |
| Figure S21. Positive MALDI MS of 7,23-(PhCH <sub>2</sub> ) <sub>2</sub> C <sub>70</sub>                                                                                                   | S24 |

- Figure S22.  $^1\text{H}$  NMR spectrum of 1,2- $\text{H}(\text{PhCH}_2)\text{C}_{70}$  obtained from DMF solution into which 100  $\mu\text{L}$   $\text{D}_2\text{O}$  was added S25
- Figure S23.  $^1\text{H}$  NMR spectrum of 7,23- $(\text{PhCH}_2)\text{HC}_{70}$  obtained from DMF into which 100  $\mu\text{L}$   $\text{D}_2\text{O}$  was added S26
- Figure S24. HPLC traces of the crude reaction mixture obtained from the reaction of  $\text{C}_{70}^{2-}$  with benzyl bromide in freshly distilled PhCN S27
- Figure S25. HPLC traces of the crude reaction mixture obtained from the reaction of  $\text{C}_{70}^{2-}$  with benzyl bromide in freshly distilled PhCN with the addition of 200  $\mu\text{L}$   $\text{H}_2\text{O}$  after  $\text{C}_{70}^{2-}$  reacted with benzyl bromide for 5 min S28
- Figure S26. Cyclic voltammogram of  $\text{C}_{70}$  in PhCN containing 0.1 M TBAP. S29
- Cartesian coordinates, total energies and the lowest frequencies of the reported stationary points for 1- $\text{PhCH}_2\text{C}_{70}^-$ , 2- $\text{PhCH}_2\text{C}_{70}^-$ , 5- $\text{PhCH}_2\text{C}_{70}^-$ , 7- $\text{PhCH}_2\text{C}_{70}^-$ , 21- $\text{PhCH}_2\text{C}_{70}^-$  intermediates and **2**, **4**, **5**, **6**, **7** obtained at B3LYP/6-31G level. S30

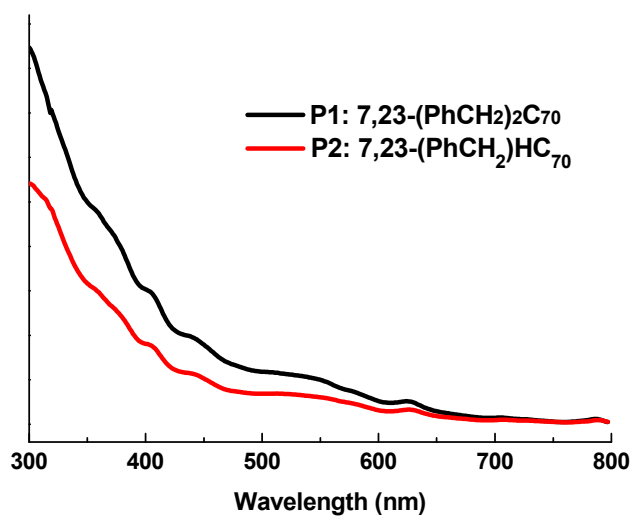

**Figure S1.** UV-vis absorption spectra of 7,23-(PhCH<sub>2</sub>)HC<sub>70</sub> and 7,23-(PhCH<sub>2</sub>)<sub>2</sub>C<sub>70</sub> recorded in toluene.

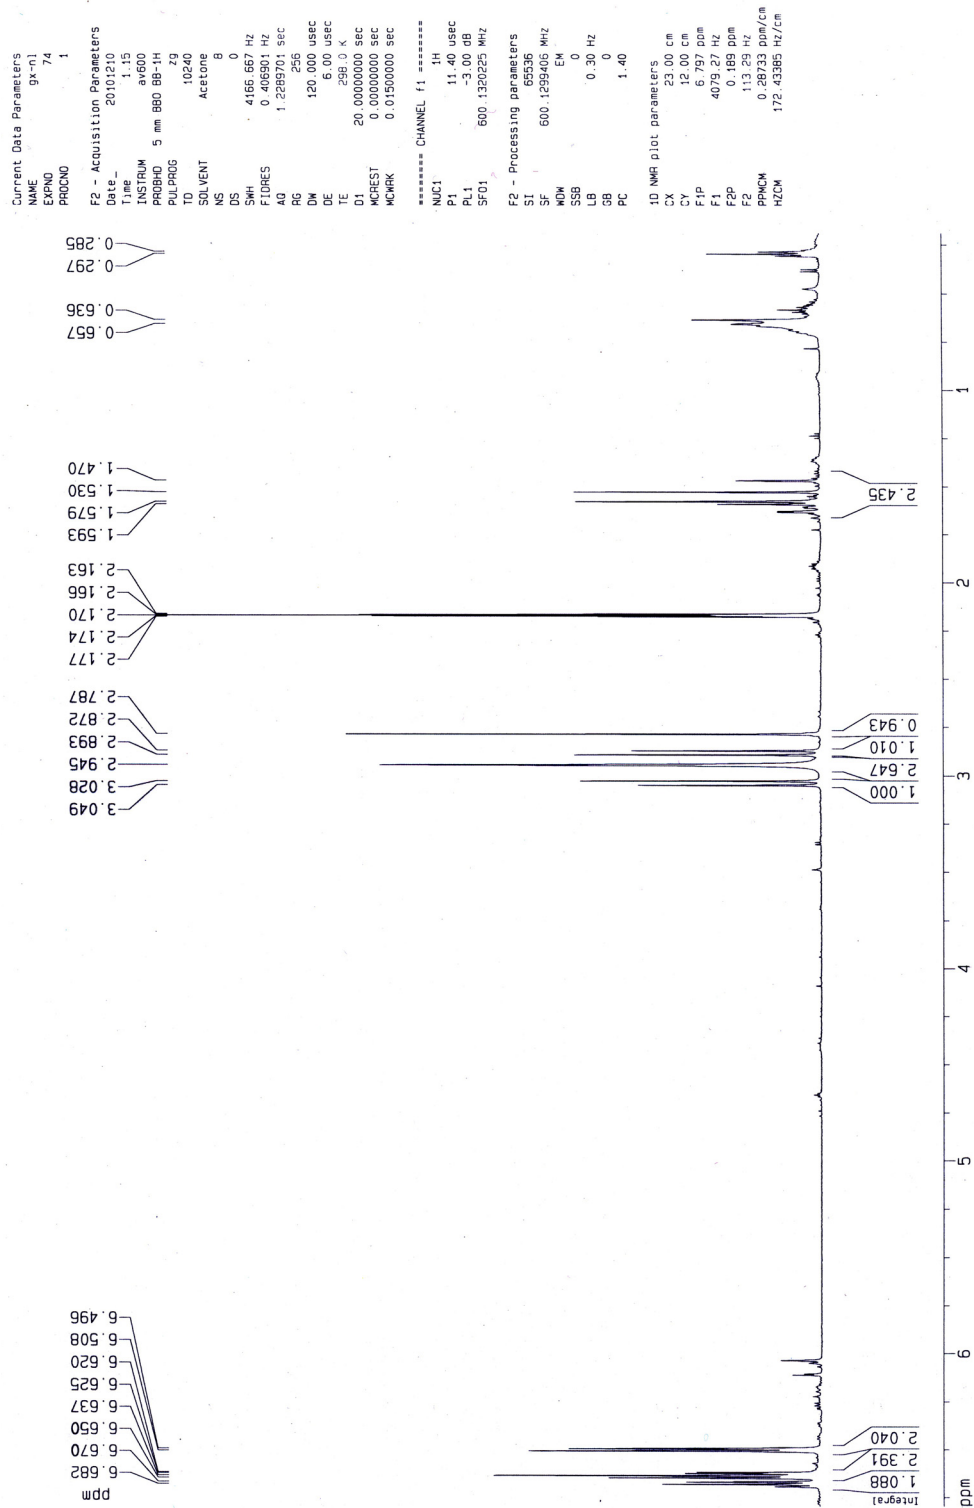

**Figure S2.**  $^1\text{H}$  NMR spectrum of 7,23-(PhCH<sub>2</sub>)HC<sub>70</sub> recorded in CS<sub>2</sub> with acetone-*d*<sub>6</sub> as the external lock.

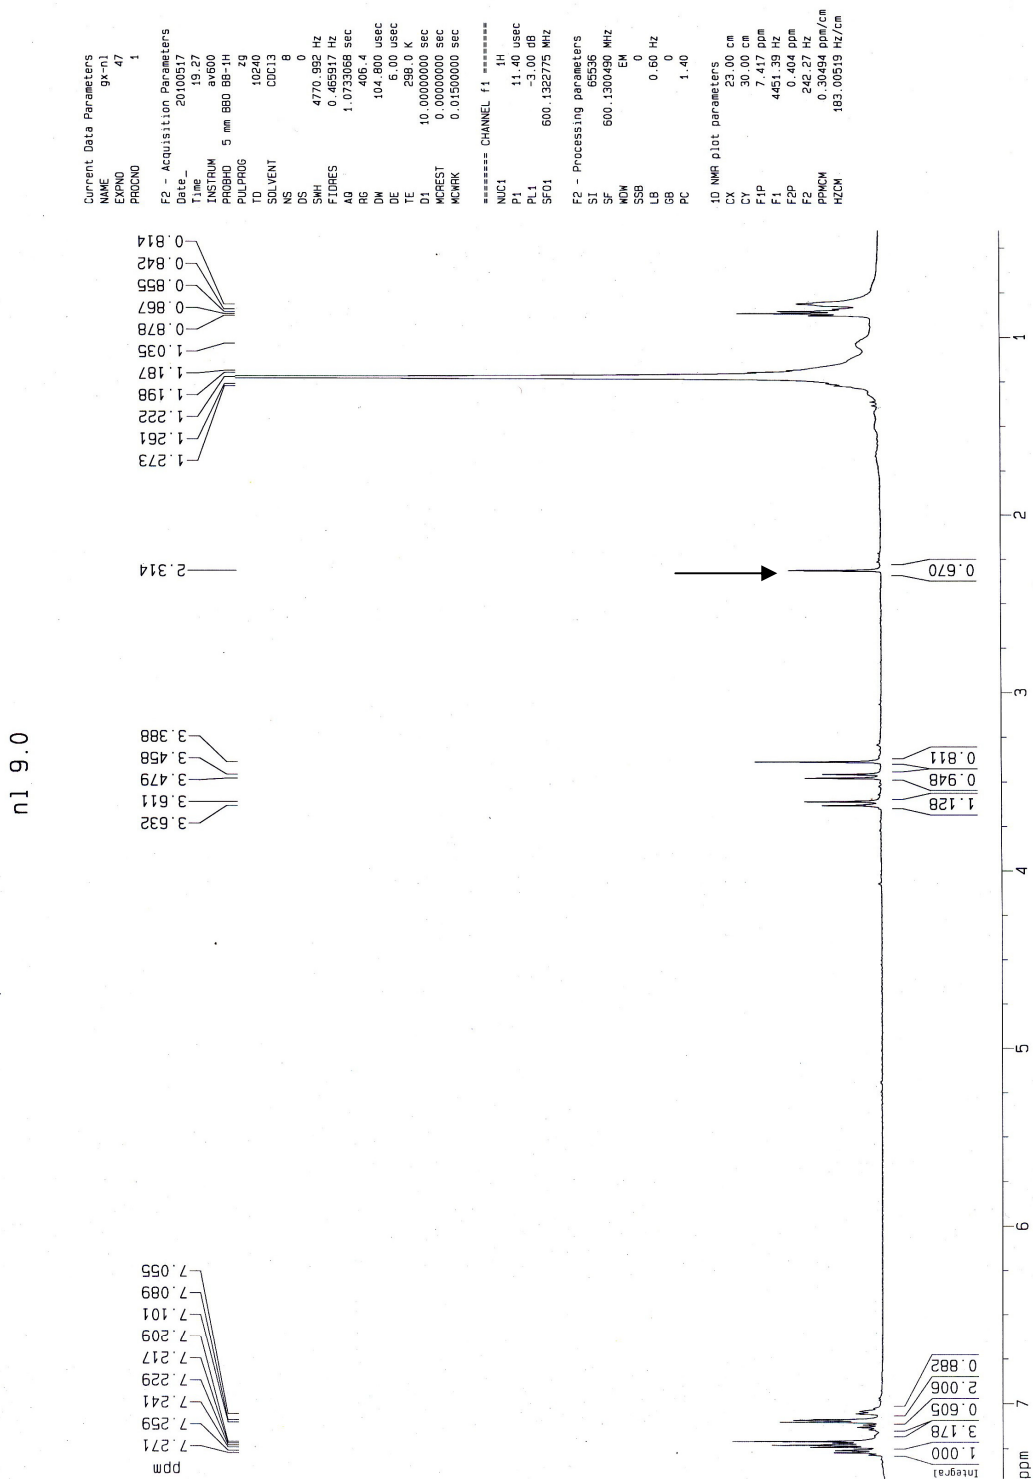

**Figure S3.**  $^1\text{H}$  NMR spectrum of 7,23-(PhCH<sub>2</sub>)HC<sub>70</sub> recorded in CS<sub>2</sub>/CDCl<sub>3</sub>. The peak labeled with an arrow is from the toluene residue used for HPLC purification.

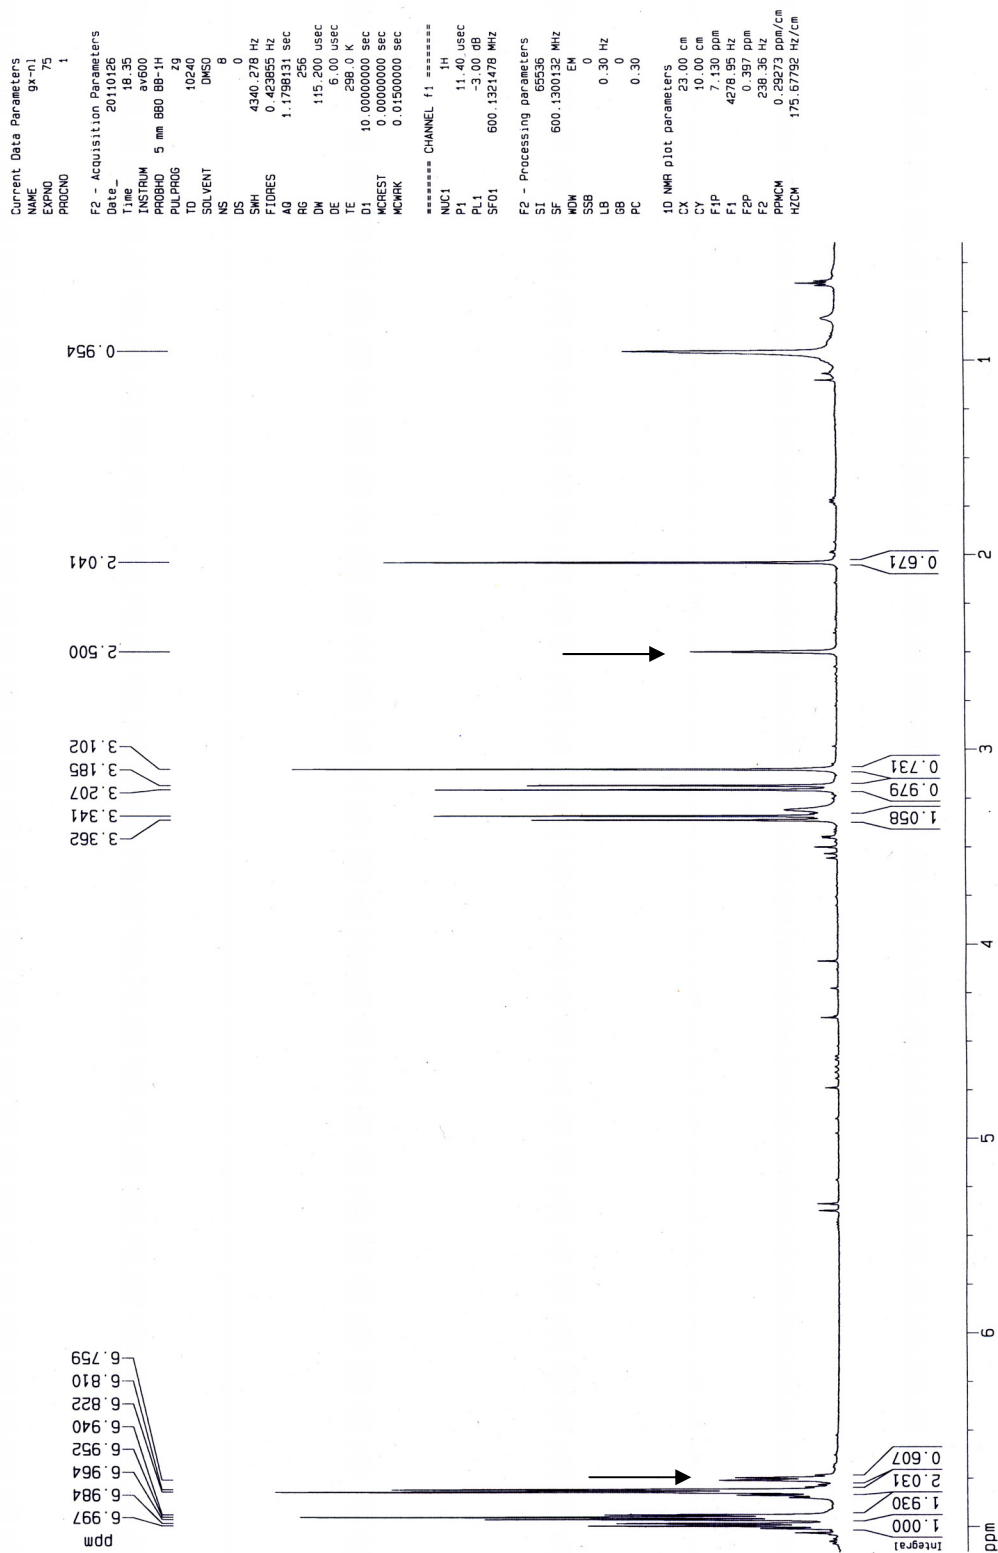

**Figure S4.**  $^1\text{H}$  NMR spectrum of 7,23-(PhCH<sub>2</sub>)HC<sub>70</sub> recorded in CS<sub>2</sub> with DMSO-*d*<sub>6</sub> as the external lock. Peaks labeled with arrows are from the toluene residue used for HPLC purification.

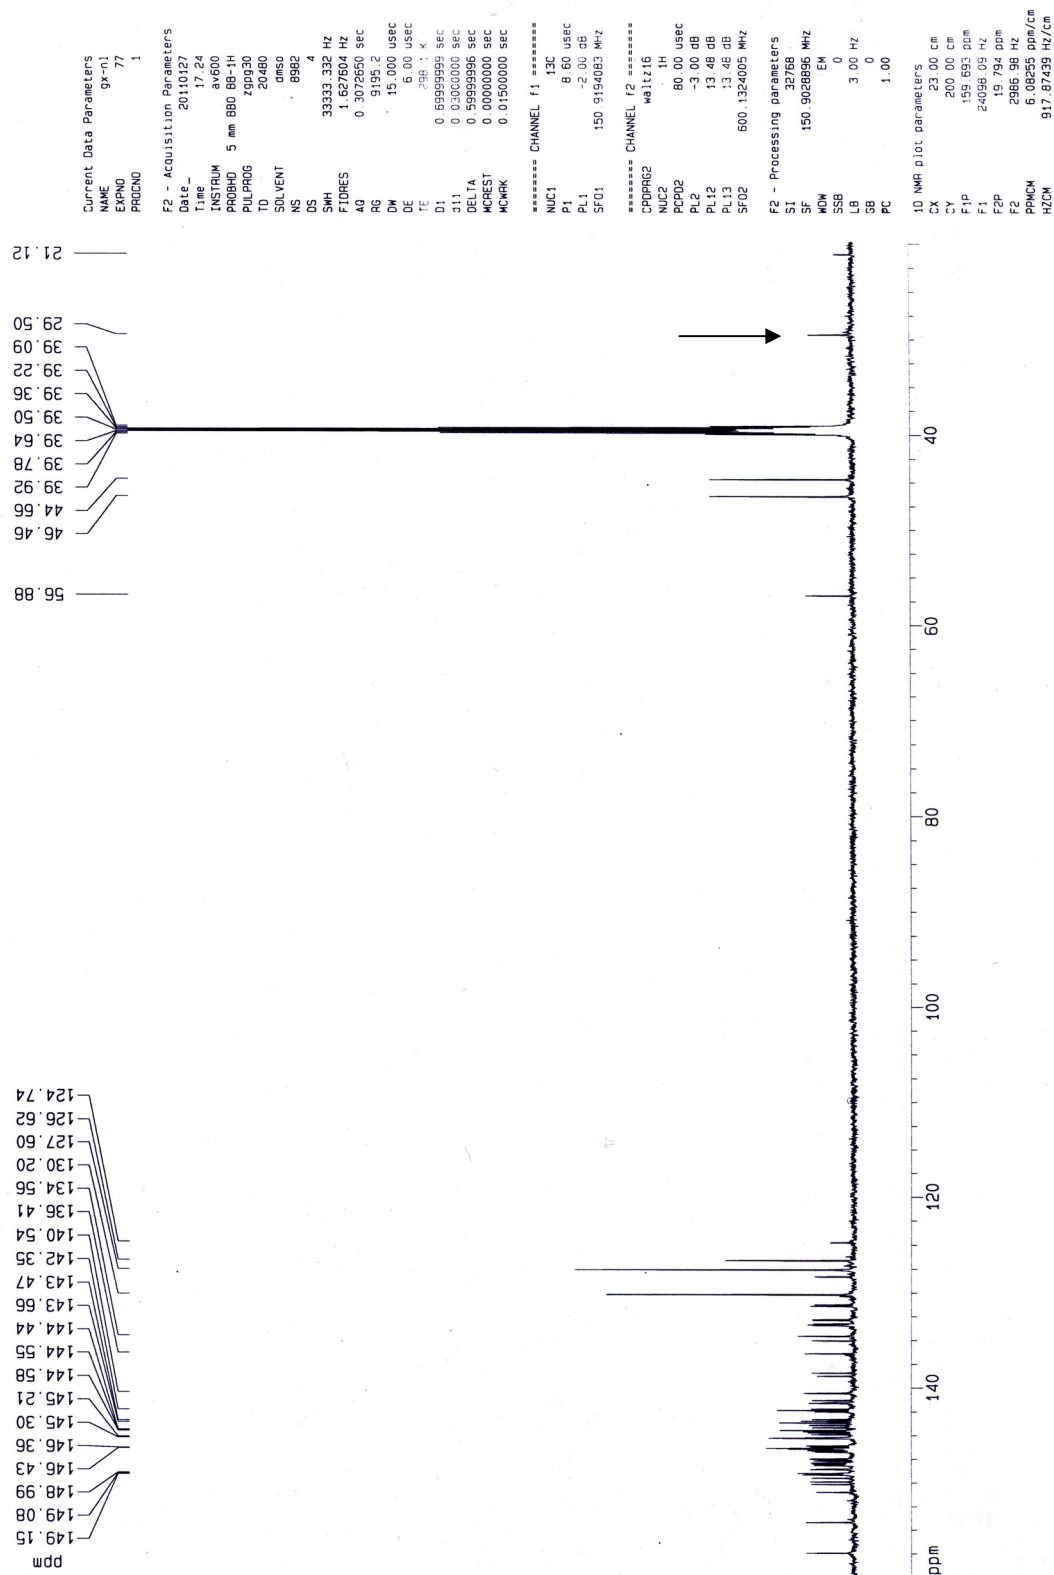

**Figure S5.** <sup>13</sup>C NMR spectrum of 7,23-(PhCH<sub>2</sub>)HC<sub>70</sub> in CS<sub>2</sub> with DMSO-*d*<sub>6</sub> as the external lock. The peak labeled with an arrow is from the toluene residue used for HPLC purification.



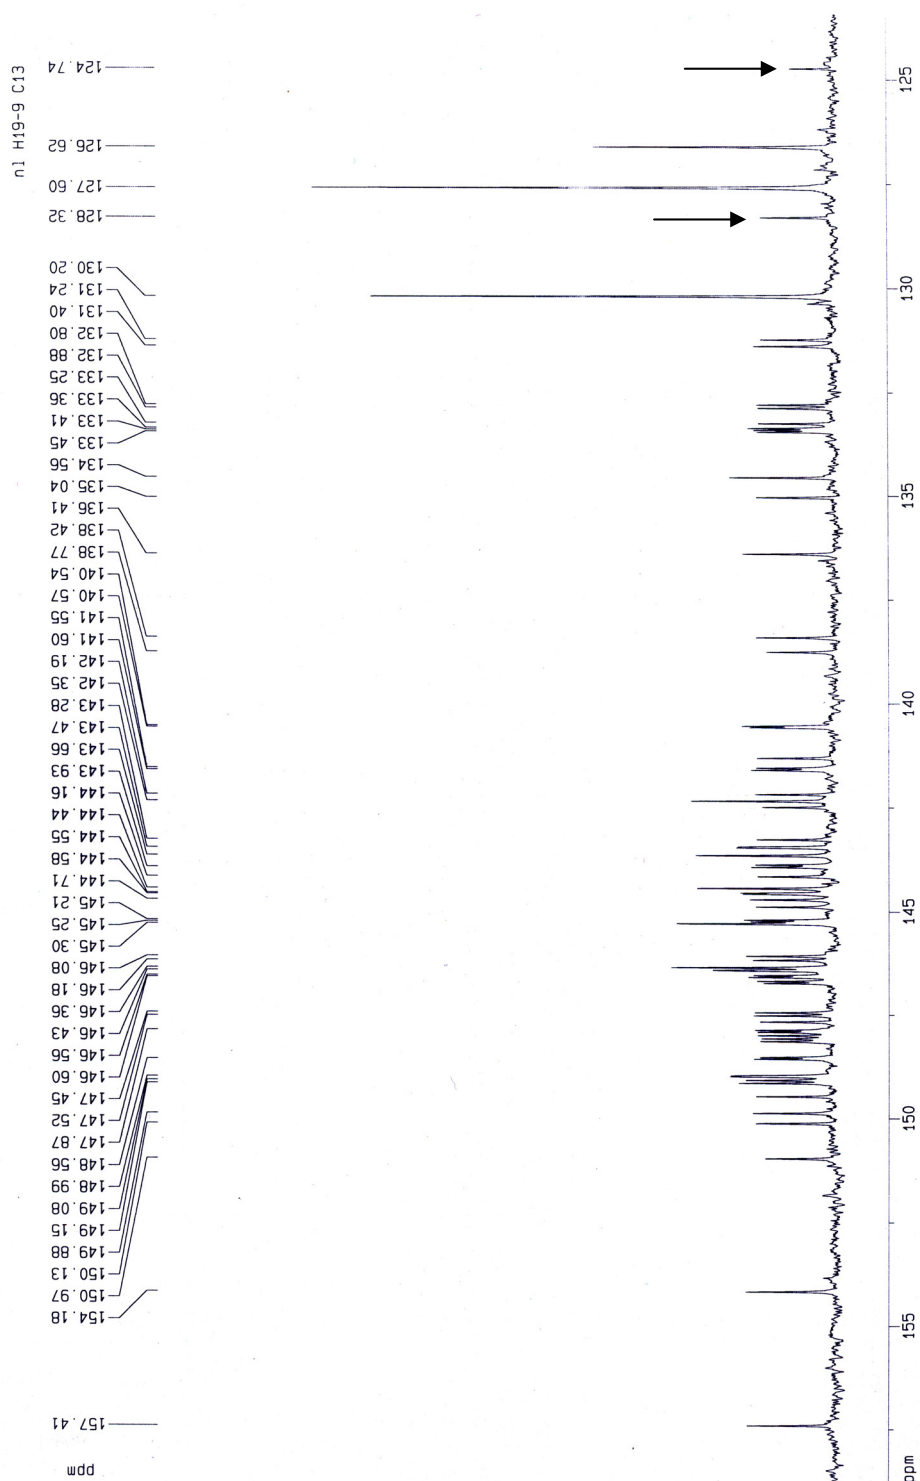

**Figure S6.** Expanded  $^{13}\text{C}$  NMR spectrum for the  $\text{sp}^2$  region of 7,23-( $\text{PhCH}_2$ ) $\text{HC}_{70}$  in  $\text{CS}_2$  with  $\text{DMSO-}d_6$  as the external lock. Peaks labeled with arrows are due to the toluene residue used for HPLC purification. One of the toluene resonances is coincidentally overlapped with a phenyl carbon atom of the addend at 127.60 ppm, and the last one is too weak to assign.

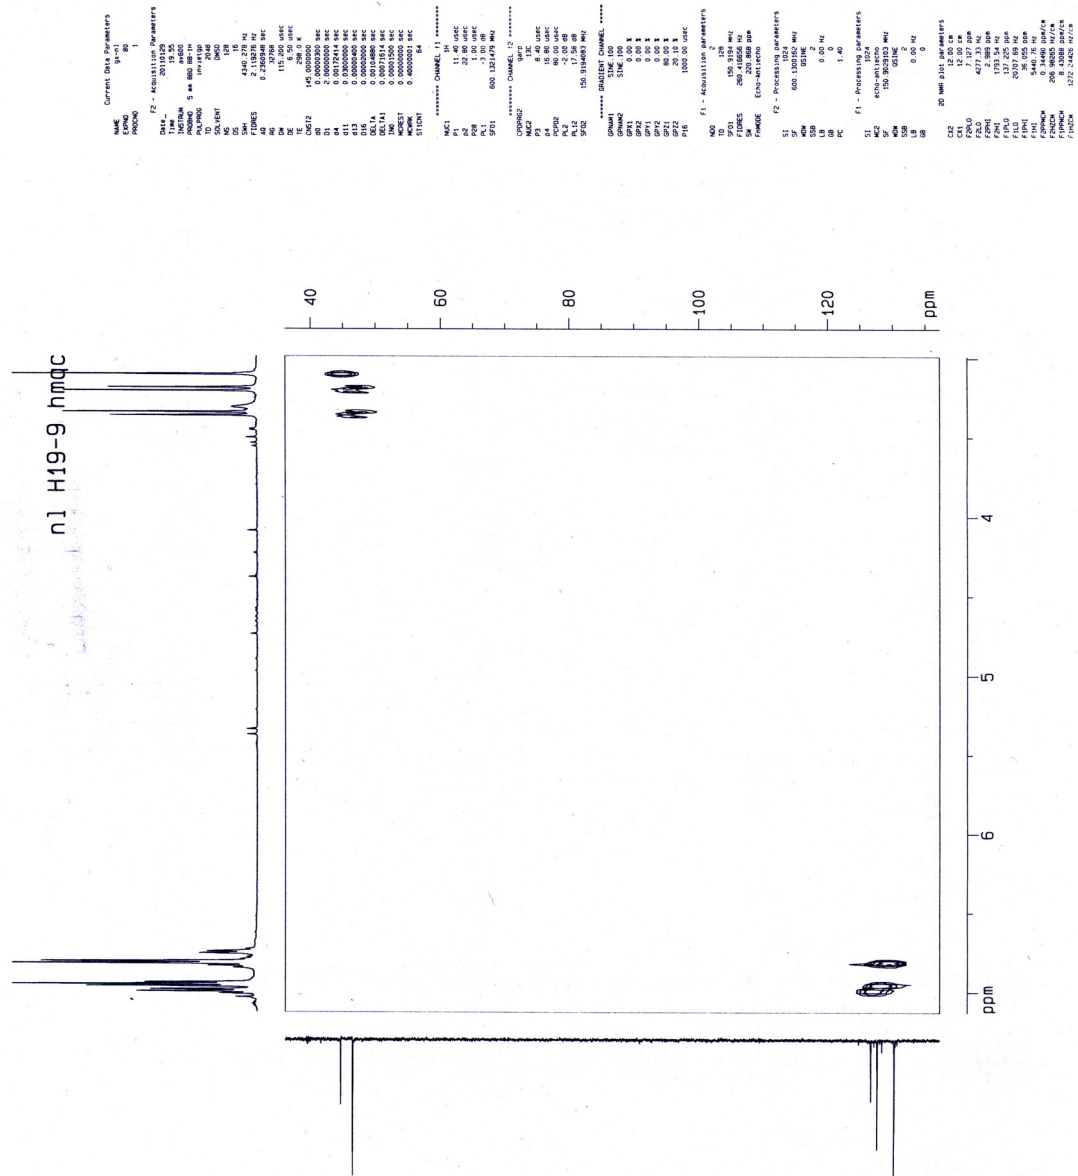

**Figure S7.** DEPT HMQC NMR spectrum of 7,23-(PhCH<sub>2</sub>)HC<sub>70</sub> in CS<sub>2</sub> with DMSO-*d*<sub>6</sub> as the external lock.



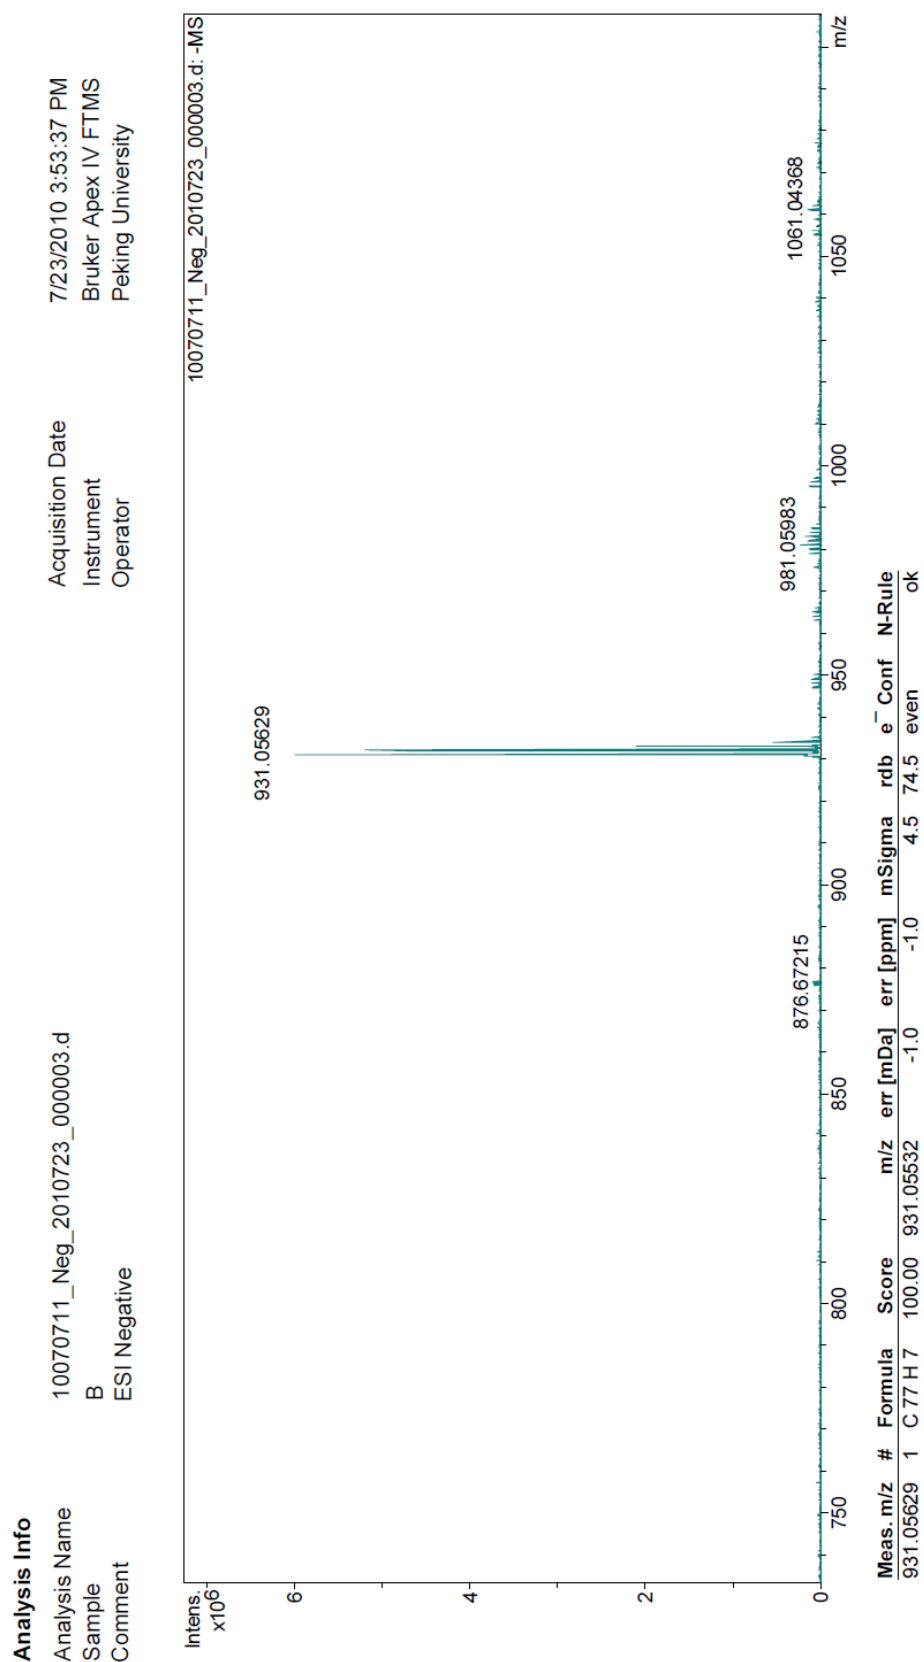

**Figure S9.** Negative ESI FT-ICR MS of 7,23-(PhCH<sub>2</sub>)HC<sub>70</sub>.

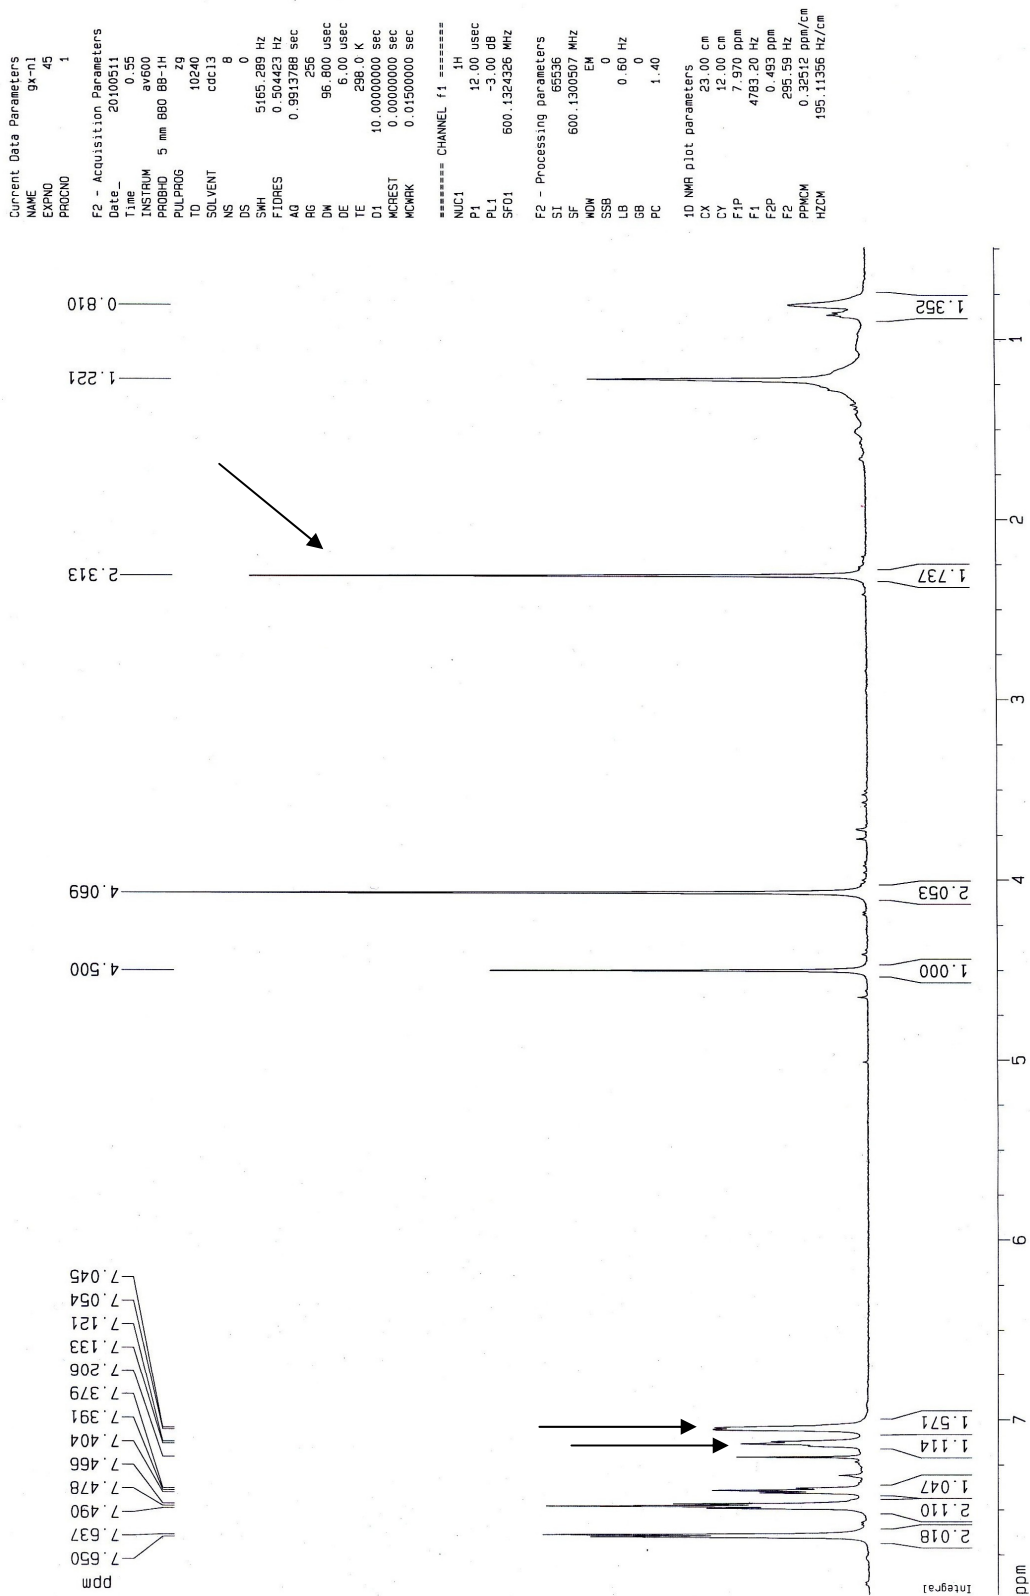

**Figure S10.**  $^1\text{H}$  NMR spectrum of 1,2-H(PhCH<sub>2</sub>)C<sub>70</sub> in CS<sub>2</sub>/CDCl<sub>3</sub>. Peaks labeled with arrows are due to the toluene residue used for HPLC purification.

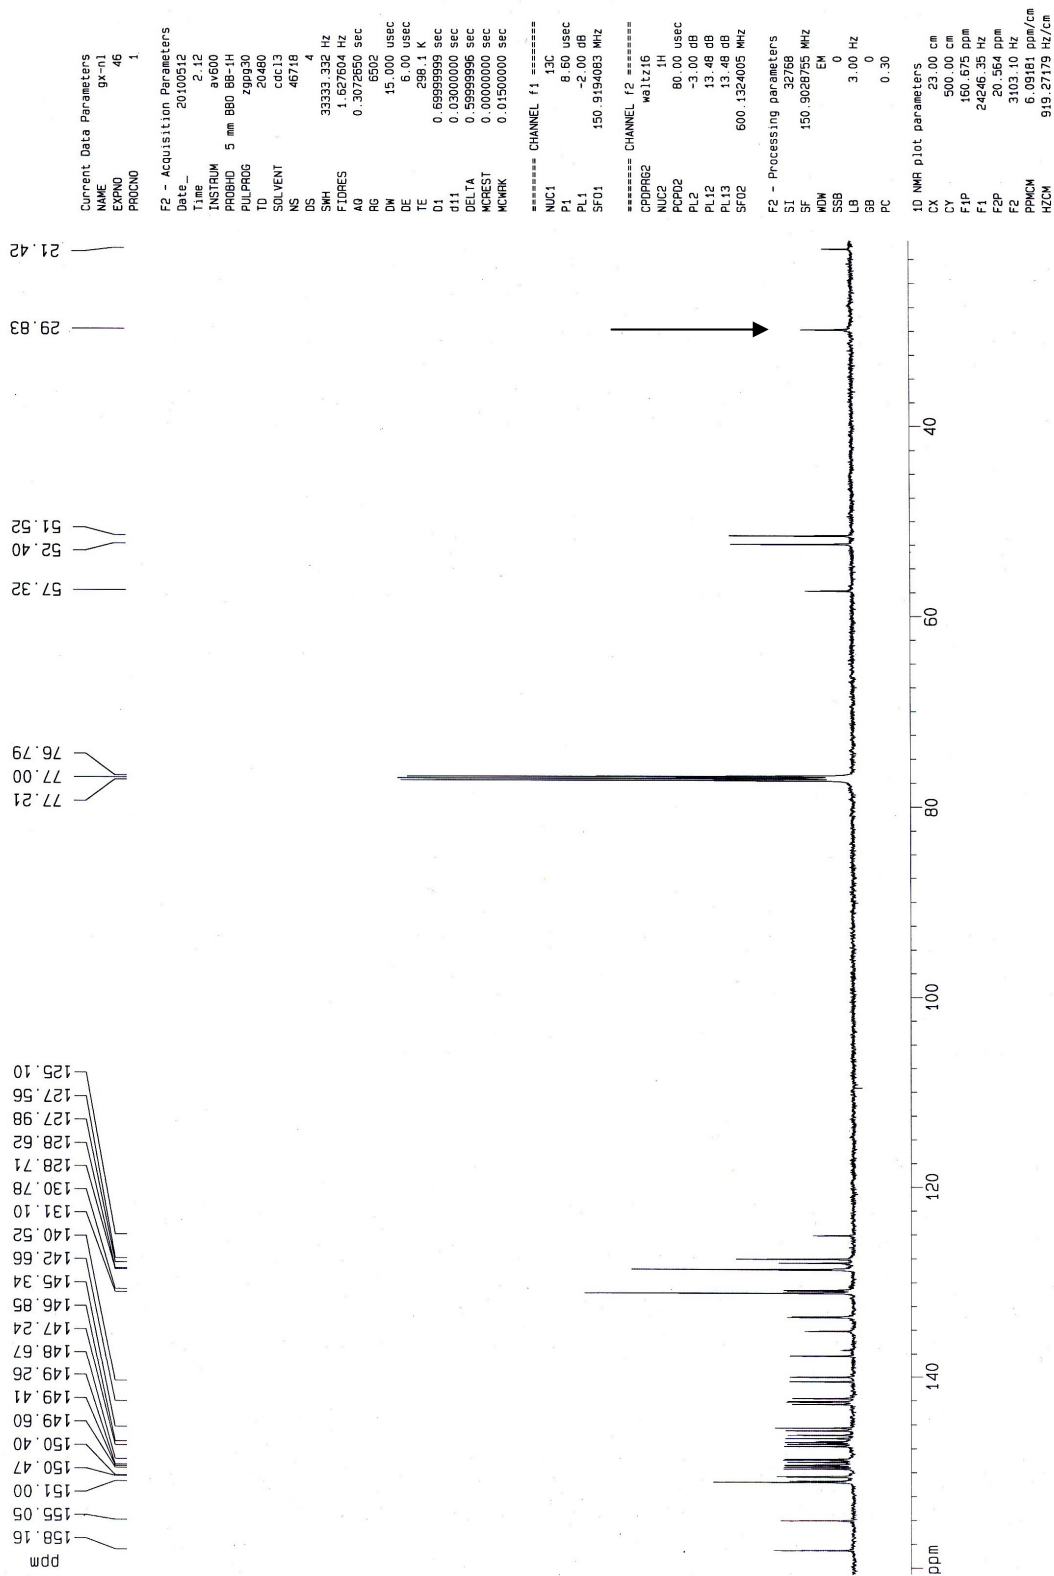

**Figure S11.**  $^{13}\text{C}$  NMR spectrum of 1,2-H(PhCH<sub>2</sub>)C<sub>70</sub> in CS<sub>2</sub>/CDCl<sub>3</sub>. The peak labeled with an arrow is due to the toluene residue used for HPLC purification.

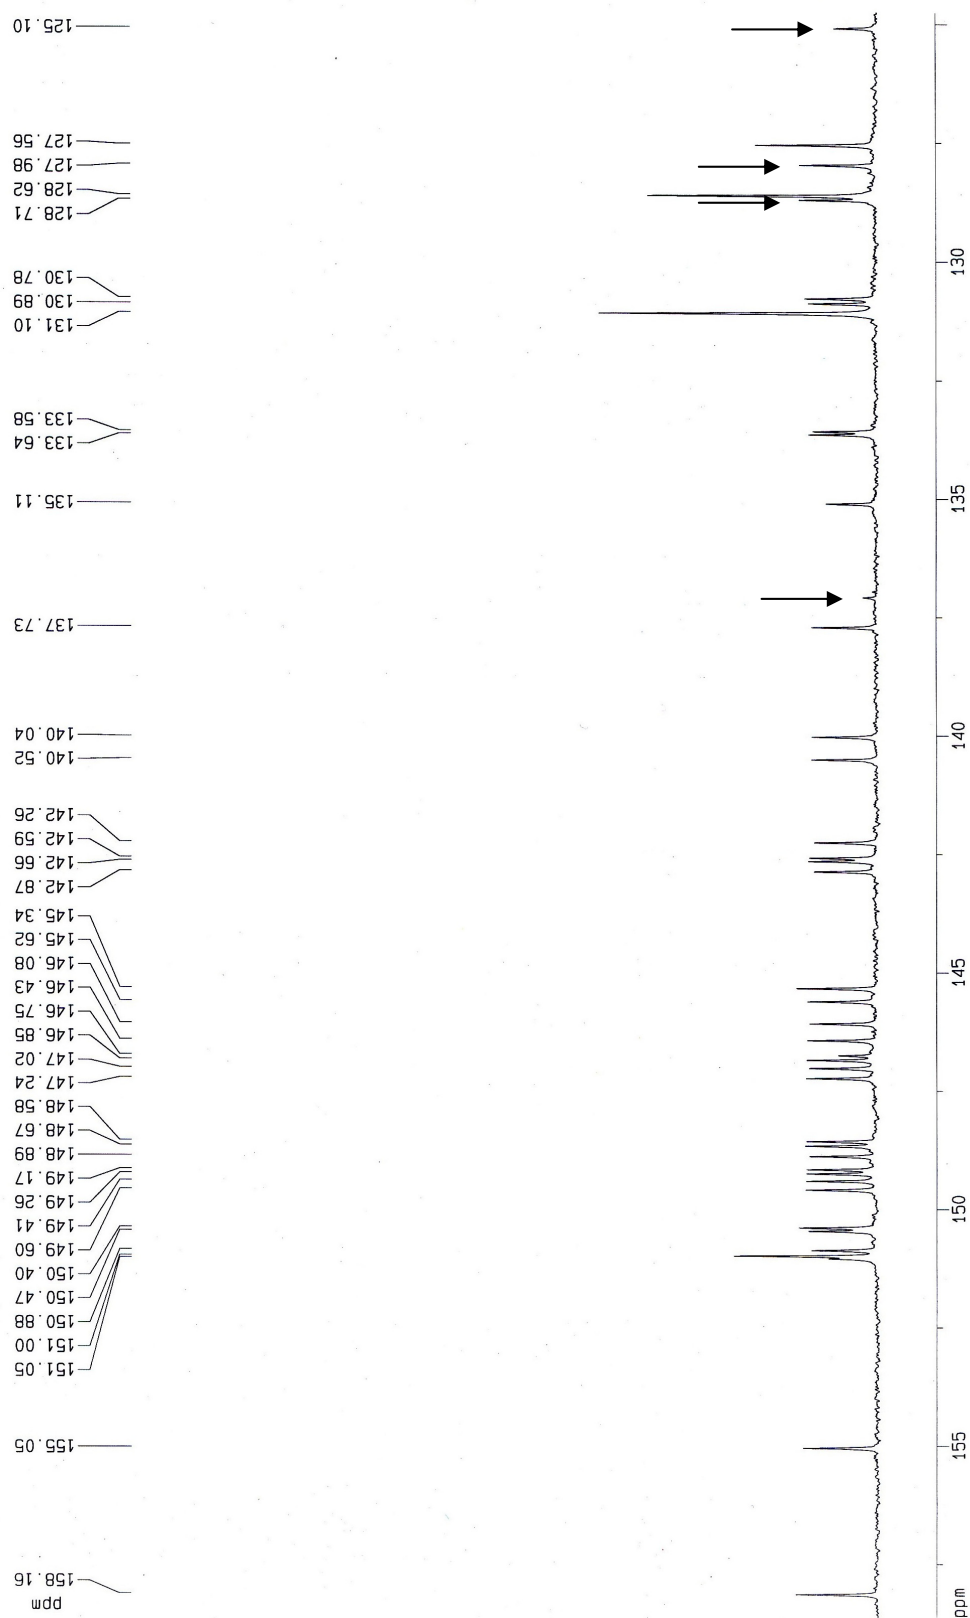

**Figure S12.** Expanded  $^{13}\text{C}$  NMR spectrum for the  $\text{sp}^2$  region of  $1,2\text{-H(PhCH}_2\text{)C}_{70}$  in  $\text{CS}_2/\text{CDCl}_3$ . Peaks labeled with arrows are from toluene residue used for HPLC purification.

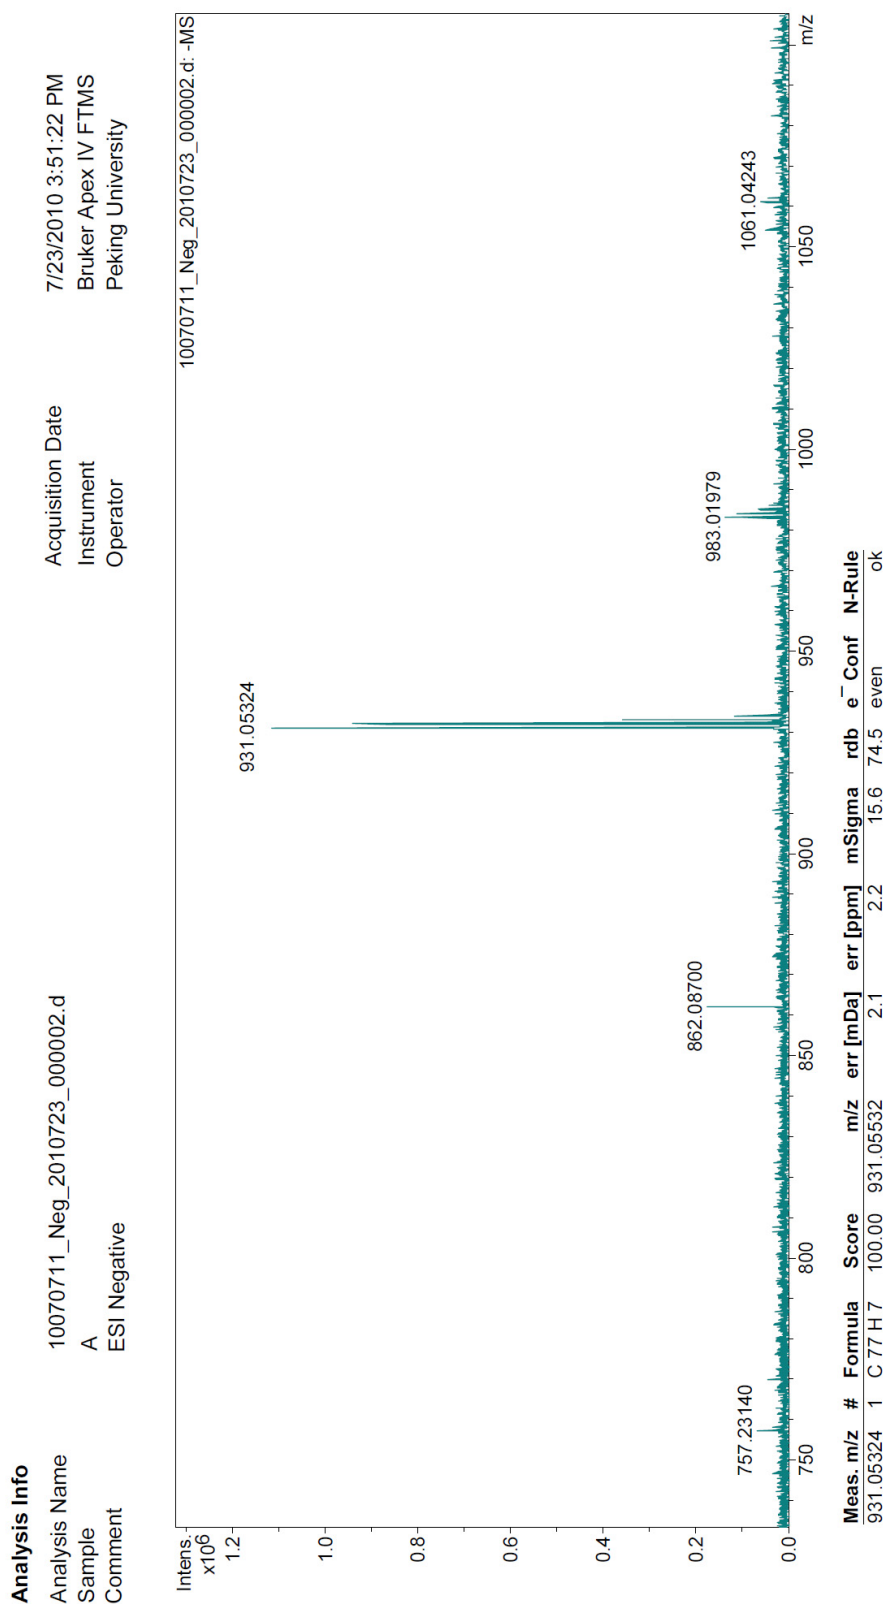

**Figure S13.** Negative ESI FT-ICR MS of 1,2-H(PhCH<sub>2</sub>)C<sub>70</sub>.



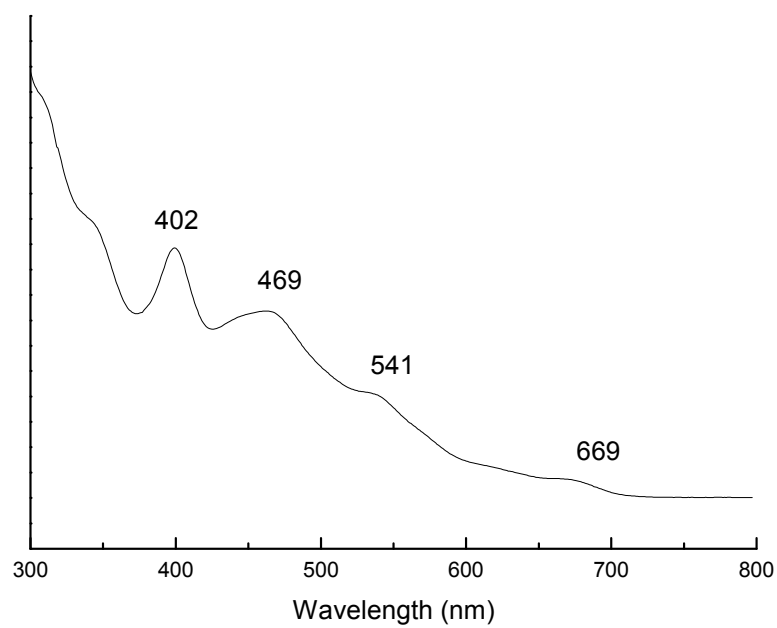

**Figure S14.** UV-vis spectrum of 1,2-H(PhCH<sub>2</sub>)C<sub>70</sub> recorded in toluene solution.

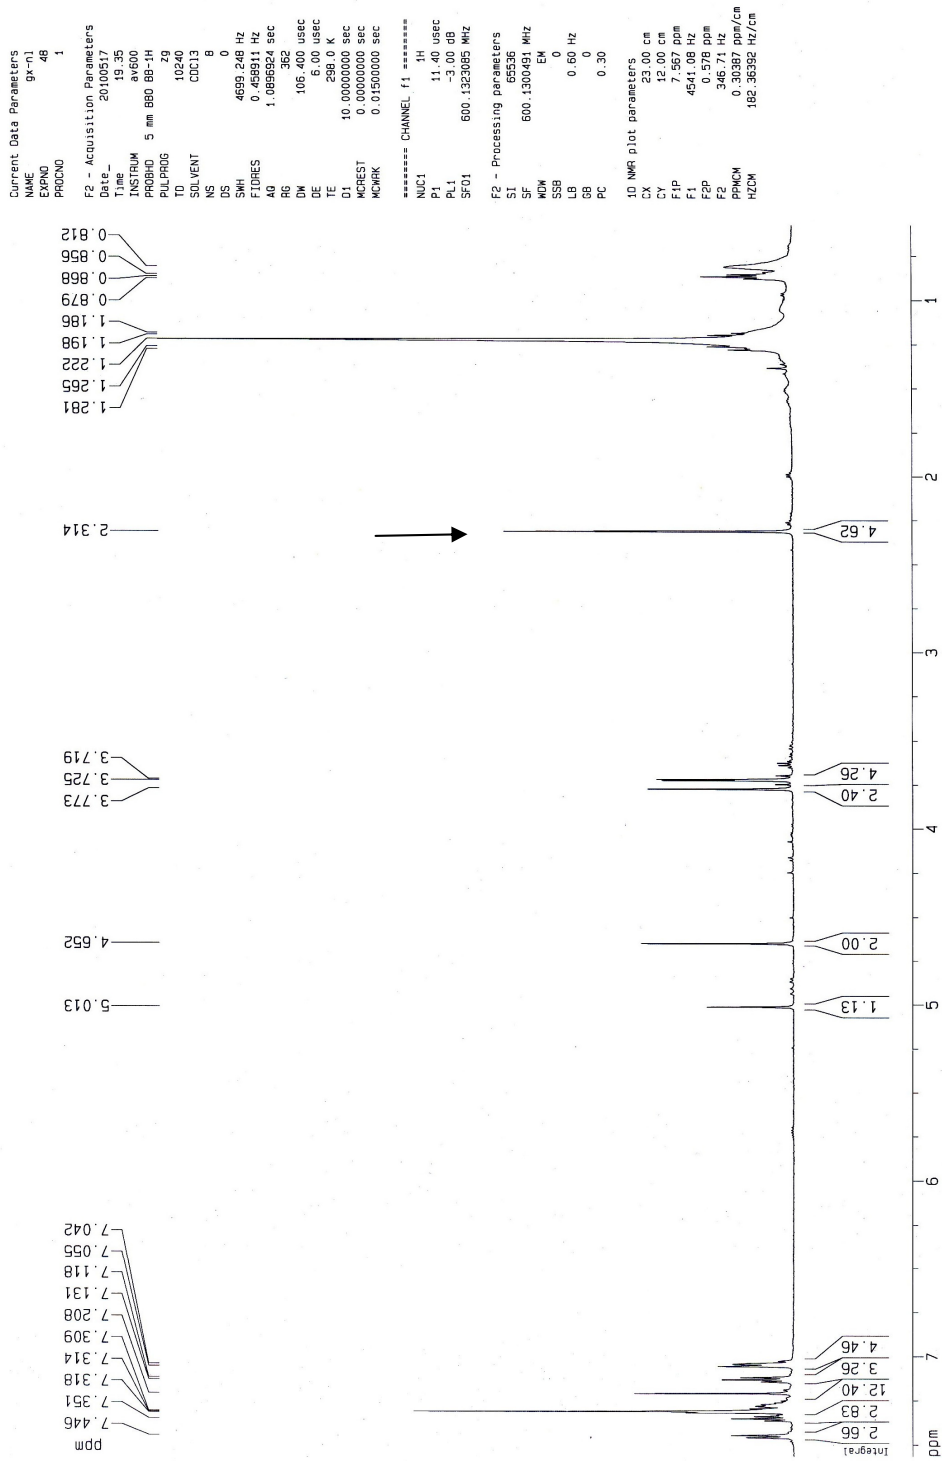

**Figure S15.**  $^1\text{H}$  NMR spectrum of 2,1-H(PhCH<sub>2</sub>)C<sub>70</sub> and 5,6-H(PhCH<sub>2</sub>)C<sub>70</sub> mixture in CS<sub>2</sub>/CDCl<sub>3</sub>.

The peak labeled with an arrow is from toluene residue used for HPLC purification.

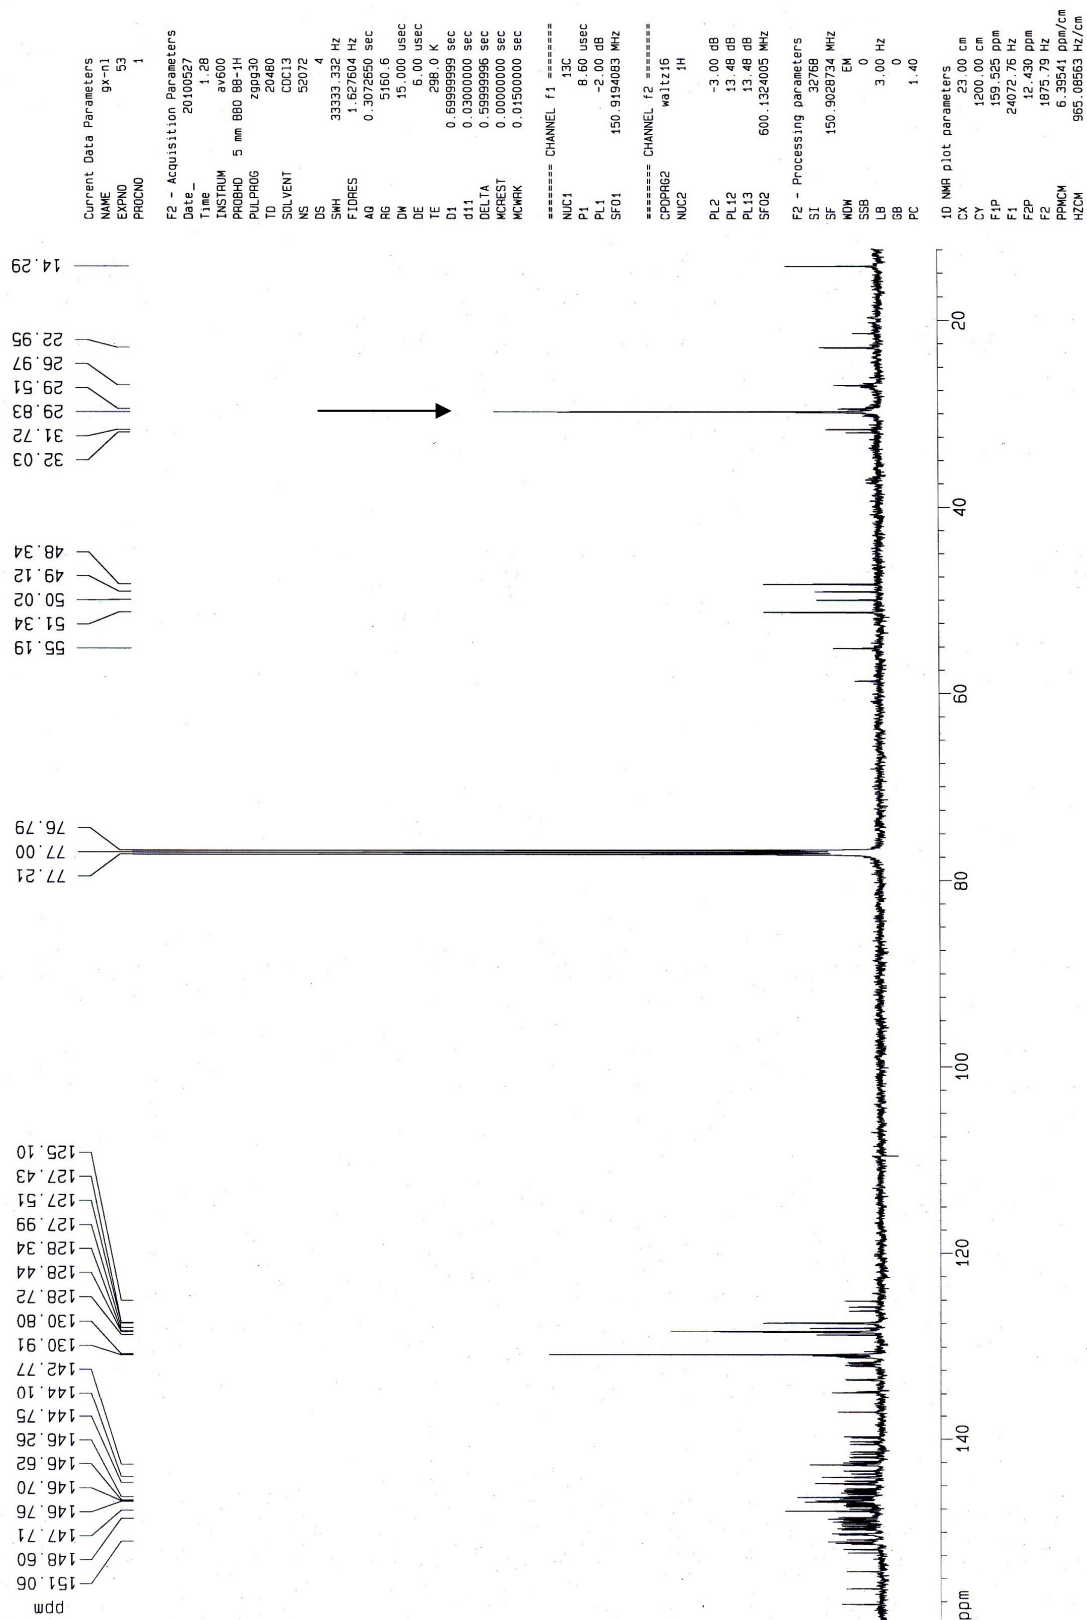

**Figure S16.**  $^{13}\text{C}$  NMR spectrum of 2,1-H(PhCH<sub>2</sub>)C<sub>70</sub> and 5,6-H(PhCH<sub>2</sub>)C<sub>70</sub> mixture in CS<sub>2</sub>/CDCl<sub>3</sub>.

The peak labeled with an arrow is from toluene residue used for HPLC purification.

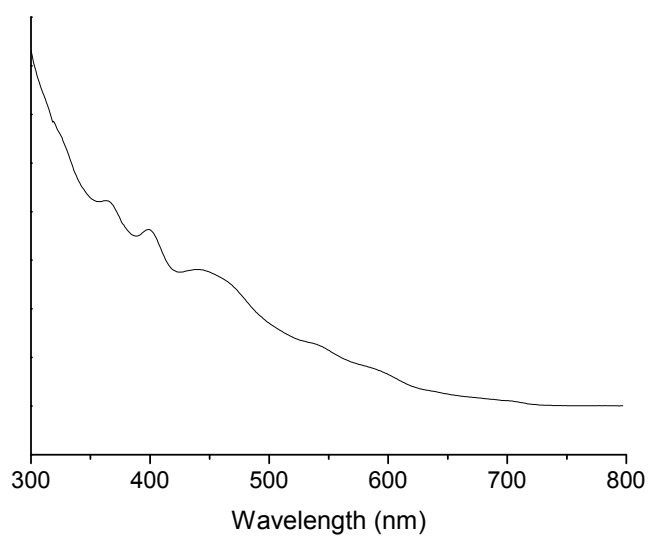

**Figure S17.** Uv-vis absorption spectrum of 2,1-H(PhCH<sub>2</sub>)C<sub>70</sub> and 5,6-H(PhCH<sub>2</sub>)C<sub>70</sub> mixture recorded in toluene.

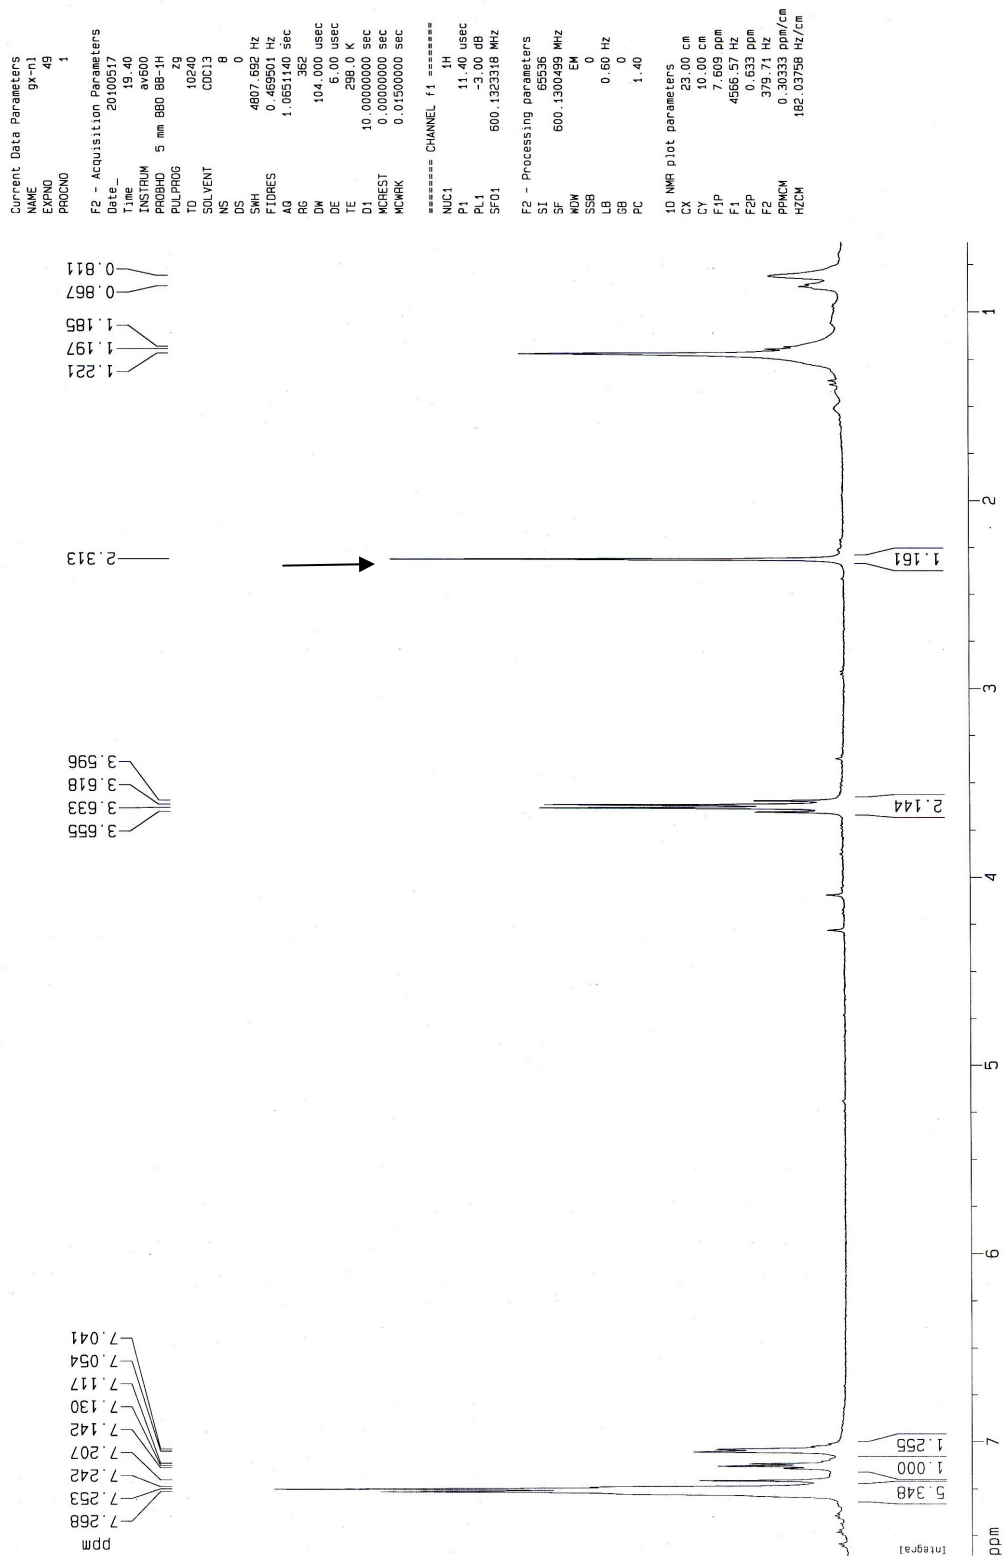

**Figure S18.**  $^1\text{H}$  NMR spectrum of 7,23-(PhCH<sub>2</sub>)<sub>2</sub>C<sub>70</sub> in CS<sub>2</sub>/CDCl<sub>3</sub>. Peak labeled with arrows is from toluene residue used for HPLC purification.

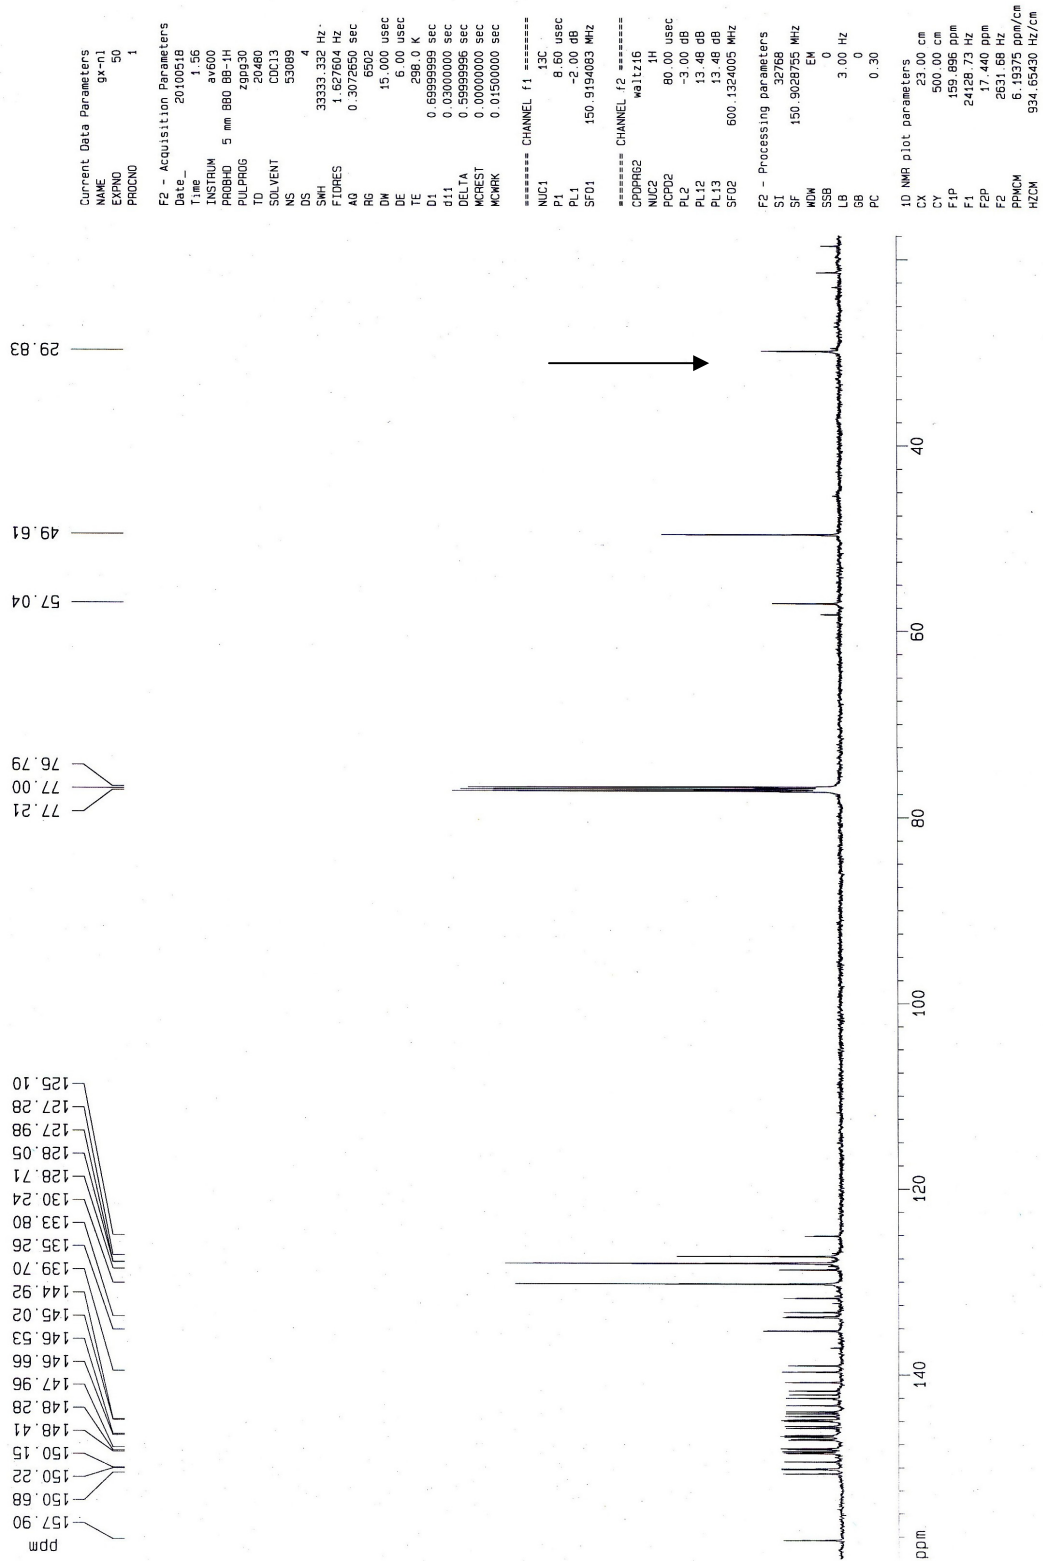

**Figure S19.**  $^{13}\text{C}$  NMR spectrum of 7,23-( $\text{PhCH}_2$ ) $_2\text{C}_{70}$  in  $\text{CS}_2/\text{CDCl}_3$ . The peak labeled with an arrow is from toluene residue used for HPLC purification.

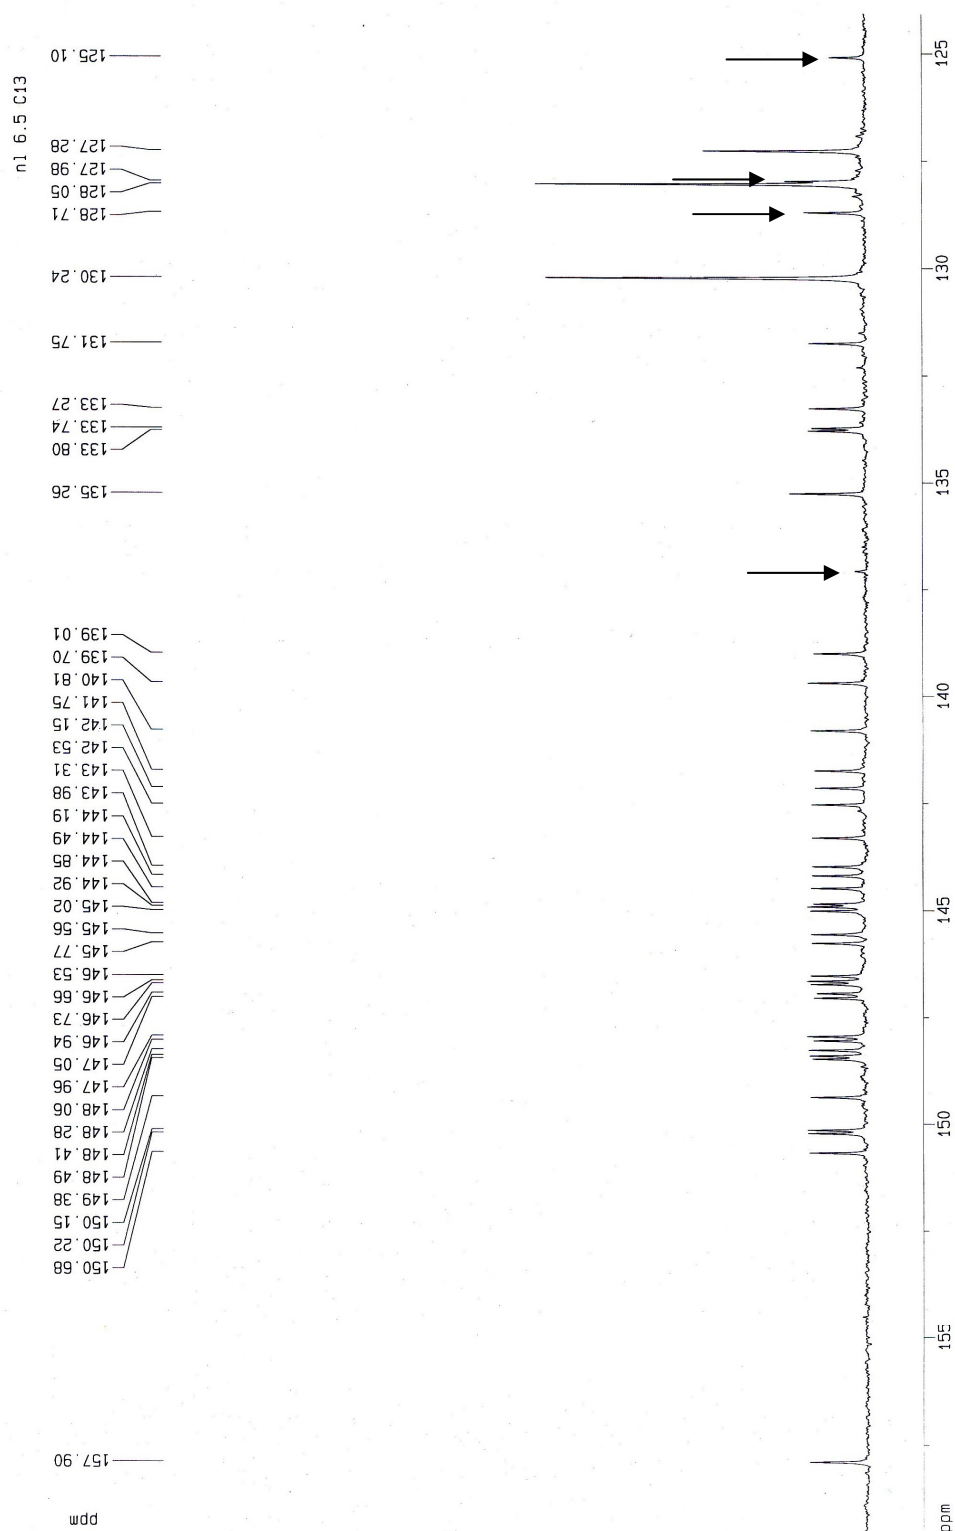

**Figure S20.** Expanded  $^{13}\text{C}$  NMR spectrum for the  $\text{sp}^2$  region of  $7,23\text{-(PhCH}_2)_2\text{C}_{70}$  in  $\text{CS}_2/\text{CDCl}_3$ .

Peaks labeled with arrows are from the toluene residue used for HPLC purification.

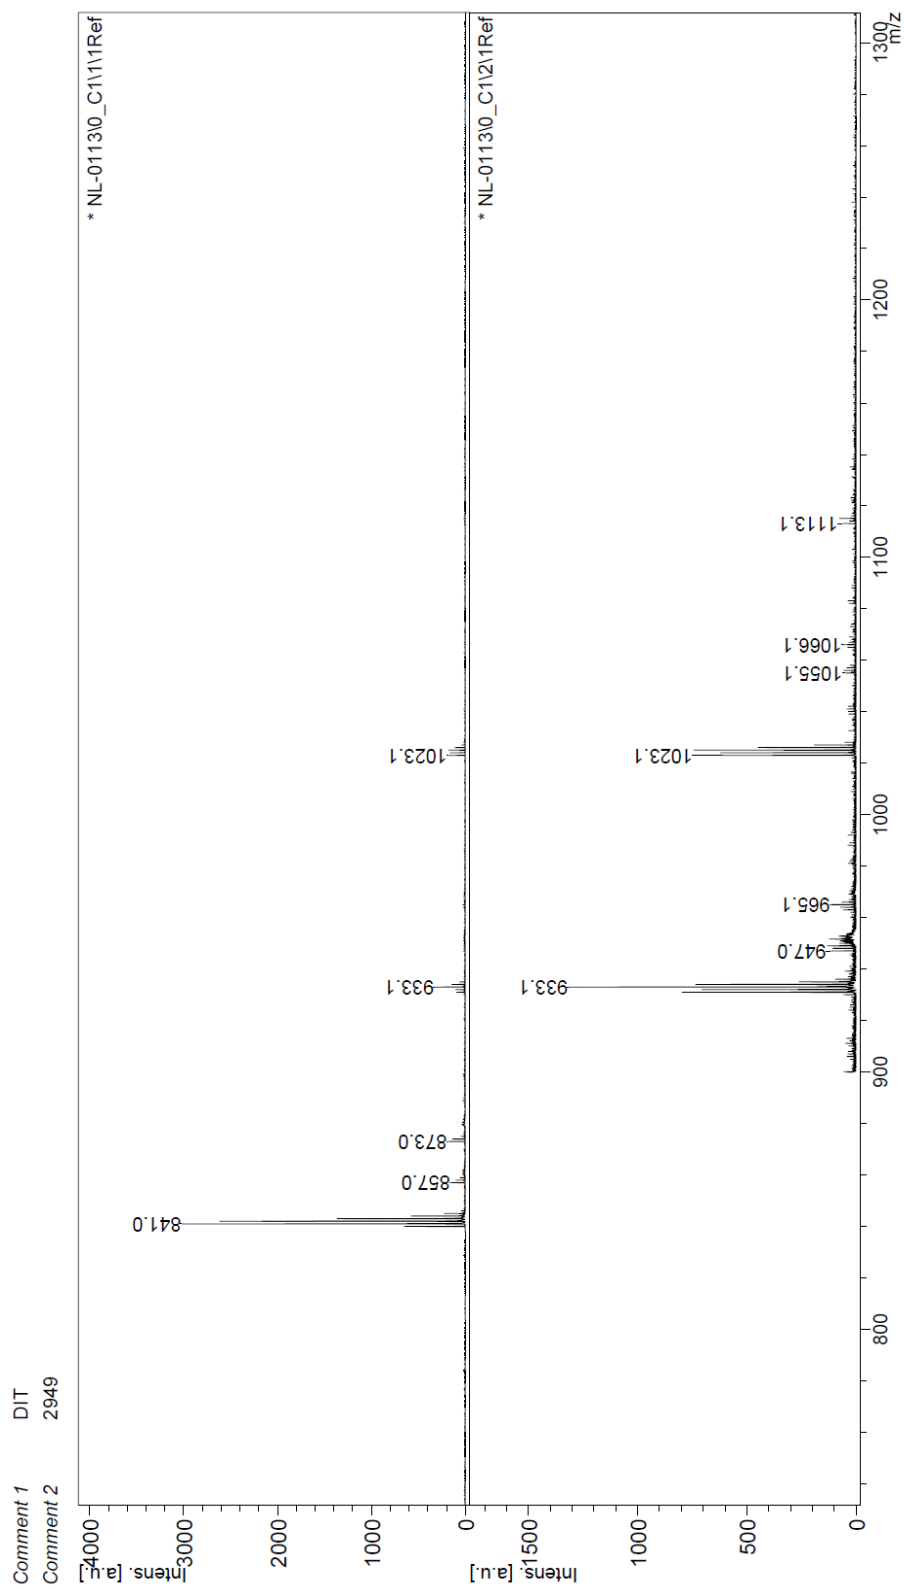

**Figure S21.** Positive MALDI MS of 7,23-(PhCH<sub>2</sub>)<sub>2</sub>C<sub>70</sub> with dithranol (DIT) as the matrix.



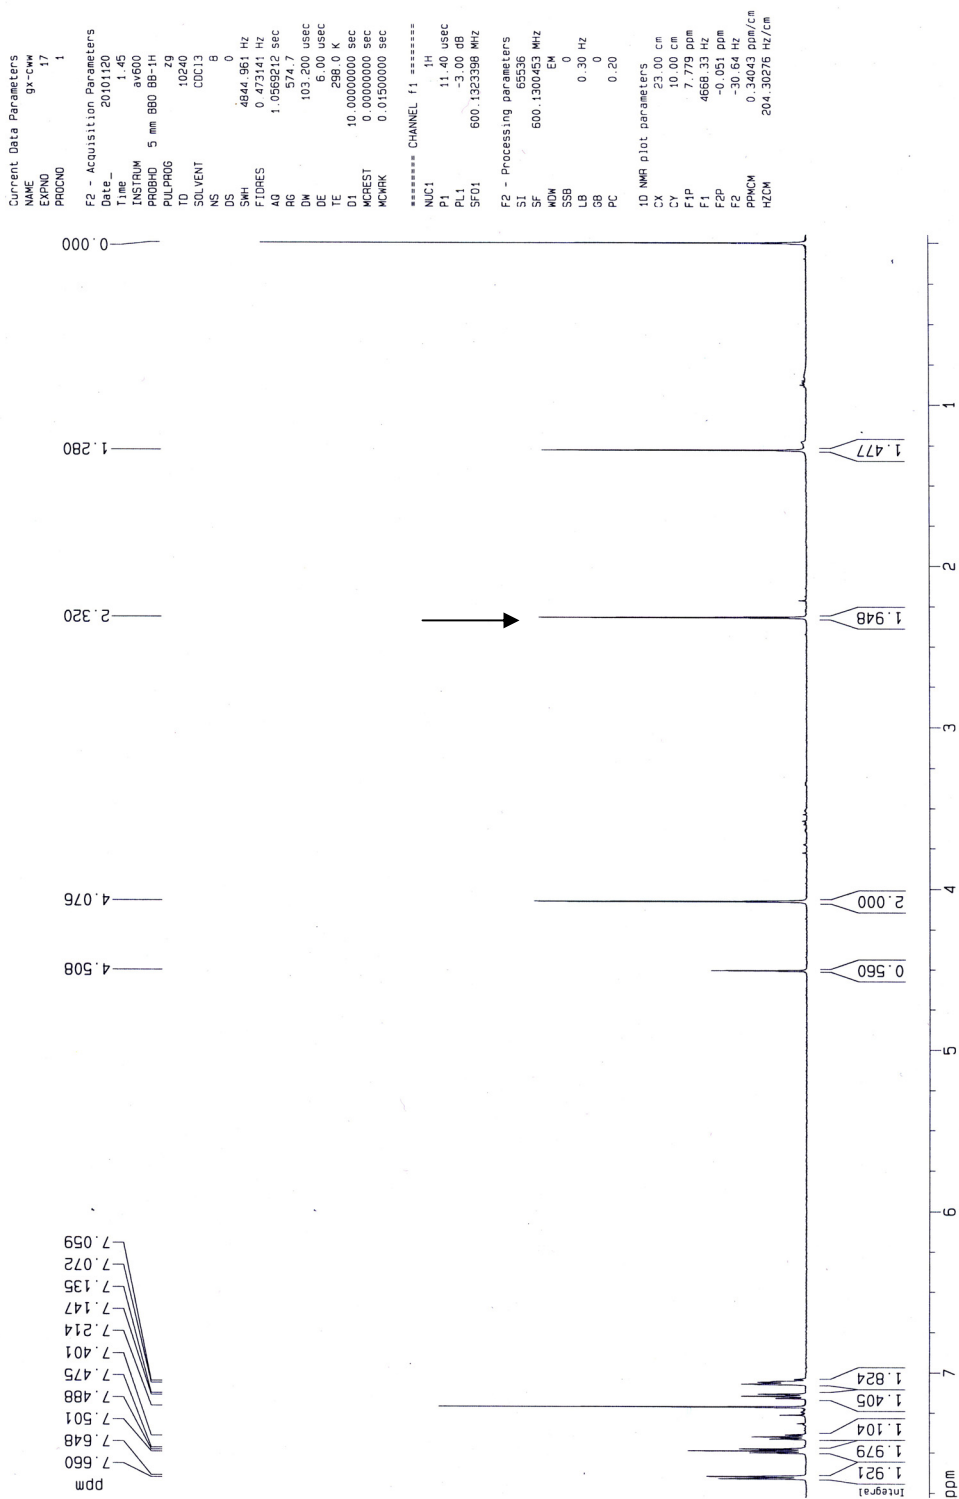

**Figure S22.**  $^1\text{H}$  NMR spectrum of partial deuterated  $1,2\text{-H}(\text{PhCH}_2)\text{C}_{70}$  in  $\text{CS}_2/\text{CDCl}_3$  obtained from the reaction of  $\text{C}_{70}^{2-}$  with benzyl bromide in DMF into which  $100\ \mu\text{L}$   $\text{D}_2\text{O}$  was added. Peak labeled with arrows is from toluene residue used for HPLC purification.

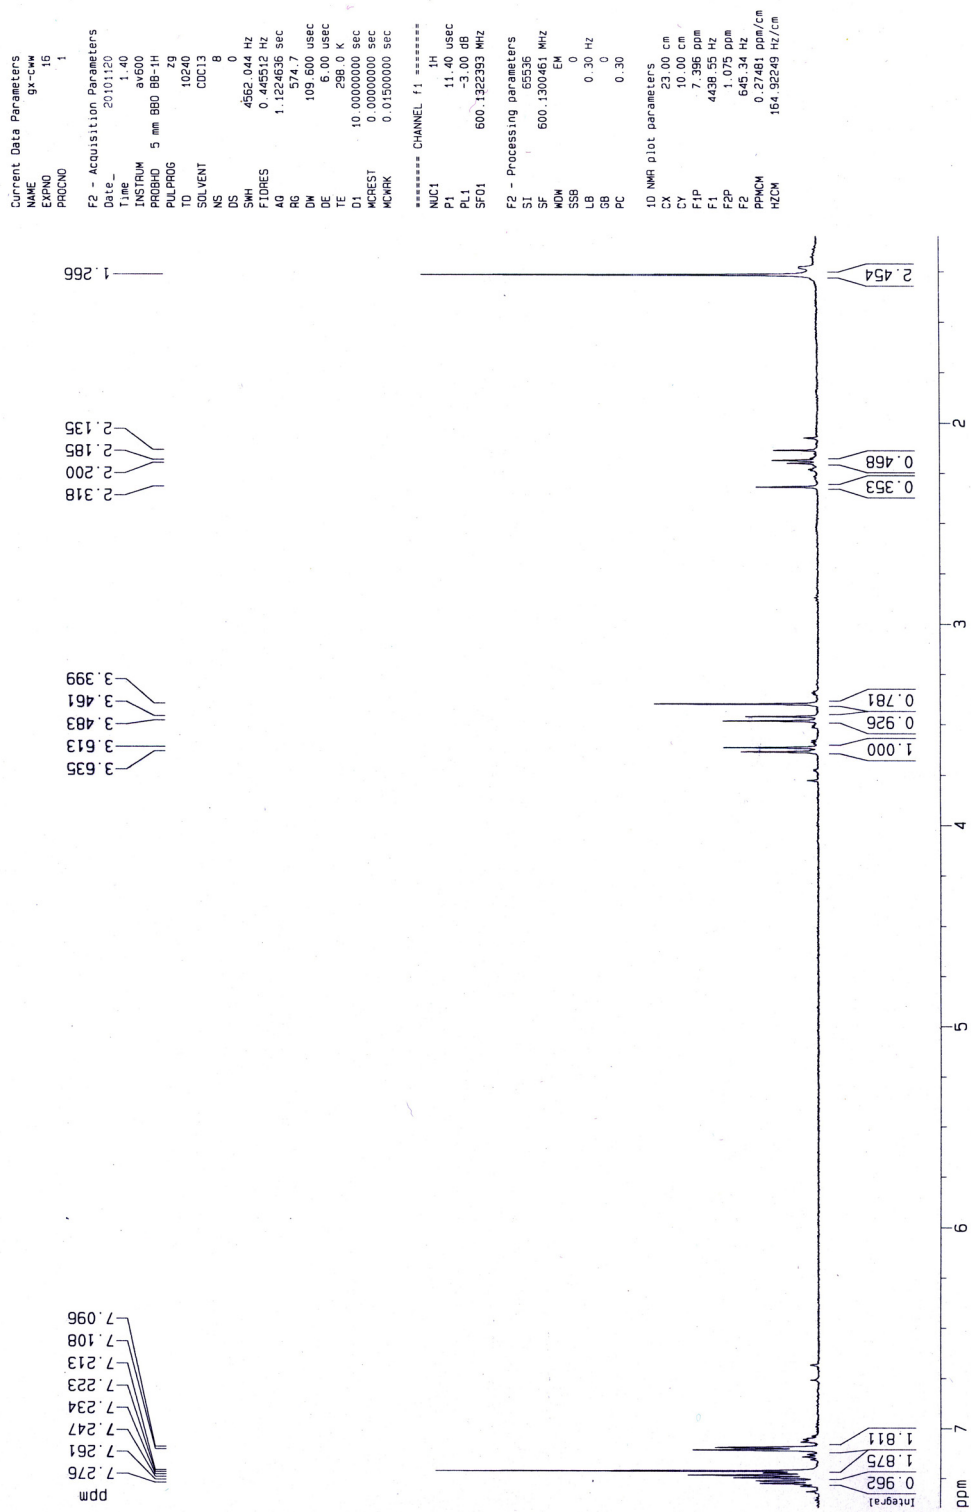

**Figure S23.**  $^1\text{H}$  NMR spectrum of partial deuterated 7,23-(PhCH<sub>2</sub>)HC<sub>70</sub> in CS<sub>2</sub>/CDCl<sub>3</sub> obtained from the reaction of C<sub>70</sub><sup>2-</sup> with benzyl bromide in DMF into which 100  $\mu\text{L}$  D<sub>2</sub>O was added.

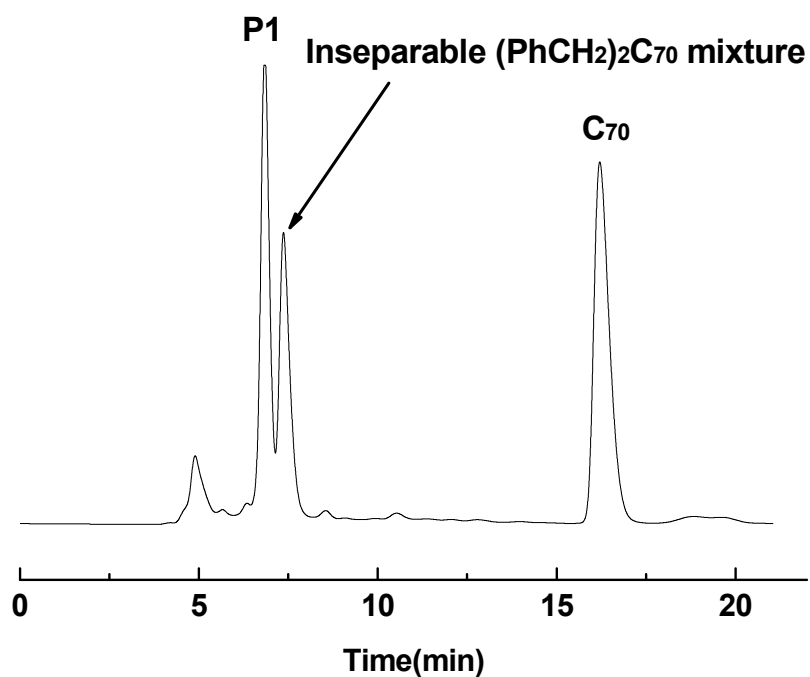

**Figure S24.** HPLC traces of the crude reaction mixture obtained from the reaction of  $C_{70}^{2-}$  with benzyl bromide in freshly distilled PhCN. The crude mixture was eluted by toluene over a semi-preparative Buckyprep column at a flow rate of 4.0 mL/min with the detector wavelength set at 380 nm.

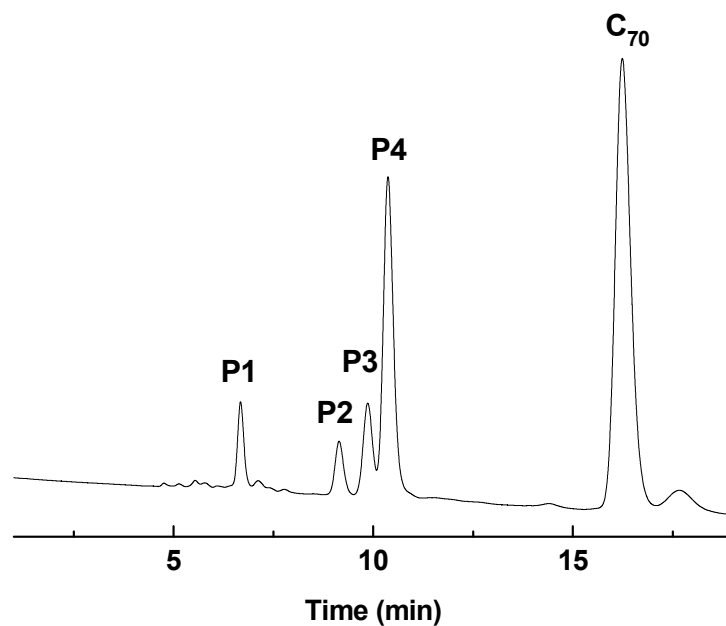

**Figure S25.** HPLC traces of the crude reaction mixture obtained from the reaction of  $C_{70}^{2-}$  with benzyl bromide in freshly distilled PhCN, where 30-fold benzyl bromide was first added into the  $C_{70}^{2-}$  solution, followed by addition of 200  $\mu$ L  $H_2O$  after  $C_{70}^{2-}$  reacted with benzyl bromide for about 5 min. The crude mixture was eluted by toluene over a semi-preparative Buckyprep column at a flow rate of 4.0 mL/min with the detector wavelength set at 380 nm.

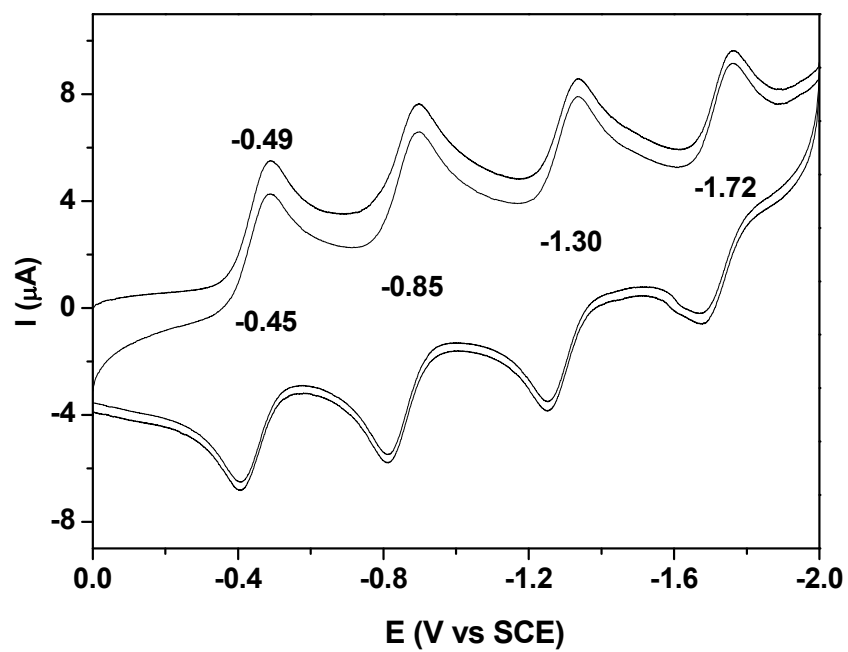

**Figure S26.** Cyclic voltammogram of C<sub>70</sub> in PhCN containing 0.1 M TBAP. Scan rate = 0.1 V/s.

Cartesian coordinates, total energies and lowest frequencies of the reported stationary points for 1-PhCH<sub>2</sub>C<sub>70</sub><sup>-</sup>, 2-PhCH<sub>2</sub>C<sub>70</sub><sup>-</sup>, 5-PhCH<sub>2</sub>C<sub>70</sub><sup>-</sup>, 7-PhCH<sub>2</sub>C<sub>70</sub><sup>-</sup>, 21-PhCH<sub>2</sub>C<sub>70</sub><sup>-</sup> intermediates and **2**, **4**, **5**, **6**, **7** obtained at B3LYP/6-31G level.

#### Geometry of 1-PhCH<sub>2</sub>C<sub>70</sub><sup>-</sup>

-1 1

|   |             |             |             |
|---|-------------|-------------|-------------|
| C | -2.01970500 | 2.93241000  | 1.14600500  |
| C | -0.91989400 | 3.81835000  | 0.71610200  |
| C | -0.91989000 | 3.81835400  | -0.71609000 |
| C | -2.01969800 | 2.93241700  | -1.14600500 |
| C | 2.93463400  | -3.28304500 | 1.17915900  |
| C | 2.26079000  | -3.81951800 | -0.00000700 |
| C | 2.93464200  | -3.28303700 | -1.17916600 |
| C | 4.02298400  | -2.42583600 | -0.72763700 |
| C | 4.02297900  | -2.42584000 | 0.72764300  |
| C | -1.85111100 | 2.15827800  | 2.31472500  |
| C | 0.29397200  | 3.82997100  | 1.42757400  |
| C | 0.29398100  | 3.82998000  | -1.42755400 |
| C | -1.85109700 | 2.15829200  | -2.31472900 |
| C | 2.18204100  | -2.91981700 | 2.30207200  |
| C | 0.87040300  | -3.96371500 | -0.00001200 |
| C | 2.18205600  | -2.91980300 | -2.30208100 |
| C | 4.30687200  | -1.23923400 | -1.42194300 |
| C | 4.30686300  | -1.23924300 | 1.42195700  |
| C | -2.31481400 | 0.76747100  | 2.27750400  |
| C | 0.47147900  | 2.99671000  | 2.59178800  |
| C | 1.54994100  | 3.82945800  | -0.69592200 |

|   |             |             |             |
|---|-------------|-------------|-------------|
| C | -0.58270800 | 2.15852100  | -2.99571900 |
| C | -2.98151100 | 0.25368200  | -1.17989500 |
| C | 2.47684800  | -1.68489000 | 3.01347500  |
| C | 0.09109600  | -3.58218800 | 1.17027700  |
| C | 0.73513100  | -3.07014000 | -2.29500300 |
| C | 3.51327400  | -0.86369800 | -2.58043500 |
| C | 4.59636100  | -0.01517400 | 0.69532300  |
| C | 0.73511600  | -3.07015400 | 2.29498400  |
| C | 3.51325800  | -0.86371400 | 2.58044600  |
| C | 4.59636600  | -0.01516900 | -0.69529900 |
| C | 2.47686700  | -1.68487200 | -3.01347500 |
| C | 0.09110300  | -3.58218000 | -1.17030300 |
| C | -0.58272600 | 2.15850300  | 2.99572300  |
| C | -2.98151800 | 0.25367500  | 1.17987200  |
| C | -2.31480000 | 0.76748500  | -2.27751900 |
| C | 0.47149500  | 2.99672600  | -2.59177200 |
| C | 1.54993700  | 3.82945400  | 0.69595000  |
| C | -1.34761100 | -0.05328600 | 2.98975900  |
| C | 1.83132300  | 2.47738500  | 2.57972800  |
| C | 2.50693300  | 3.00295900  | -1.41783800 |
| C | -0.28123100 | 0.80092700  | -3.43268000 |
| C | -2.64417500 | -1.06877800 | -0.72075600 |
| C | 1.22297700  | -1.09498000 | 3.45720700  |
| C | -1.15605900 | -2.98902400 | 0.72021000  |
| C | 0.15199100  | -1.95064100 | -3.01504200 |
| C | 3.34060100  | 0.58319800  | -2.57721800 |
| C | 4.01376300  | 1.10879200  | 1.42133200  |
| C | 0.15197200  | -1.95065900 | 3.01502600  |
| C | 3.34058400  | 0.58318200  | 2.57723700  |

|   |             |             |             |
|---|-------------|-------------|-------------|
| C | 4.01377200  | 1.10880000  | -1.42130500 |
| C | 1.22299800  | -1.09495800 | -3.45721100 |
| C | -1.15605400 | -2.98902000 | -0.72024000 |
| C | -0.28125200 | 0.80090600  | 3.43267800  |
| C | -2.64417900 | -1.06878200 | 0.72072800  |
| C | -1.34759200 | -0.05326800 | -2.98977300 |
| C | 1.83133900  | 2.47740100  | -2.57970700 |
| C | 2.50692400  | 3.00295000  | 1.41786700  |
| C | -1.11367300 | -1.41271600 | 2.64408000  |
| C | 2.15826300  | 1.19061500  | 3.09513400  |
| C | 3.50791400  | 2.25358300  | -0.73912600 |
| C | 1.05559900  | 0.31724700  | -3.54108700 |
| C | -1.78858700 | -1.94640800 | -1.45572600 |
| C | 1.05557700  | 0.31722600  | 3.54109000  |
| C | -1.78859700 | -1.94641700 | 1.45569800  |
| C | -1.11365600 | -1.41270000 | -2.64410100 |
| C | 2.15828300  | 1.19063400  | -3.09511900 |
| C | 3.50790900  | 2.25357800  | 0.73915600  |
| C | -2.73003900 | 2.46410400  | -0.00000400 |
| C | -3.48033100 | 1.12970900  | -0.00001000 |
| C | -5.04309000 | 1.35606900  | -0.00001100 |
| H | -5.26484800 | 1.96980100  | 0.88132300  |
| H | -5.26485000 | 1.96979900  | -0.88134500 |
| C | -5.90494500 | 0.11297200  | -0.00000600 |
| C | -6.31257600 | -0.48345600 | -1.20691800 |
| C | -6.31256900 | -0.48344800 | 1.20691400  |
| C | -7.10027400 | -1.63956900 | -1.20924900 |
| H | -6.00342100 | -0.03790800 | -2.14809200 |
| C | -7.10026700 | -1.63956000 | 1.20925800  |



|   |             |             |             |
|---|-------------|-------------|-------------|
| H | -6.00340600 | -0.03789200 | 2.14808100  |
| C | -7.49800000 | -2.22213200 | 0.00000800  |
| H | -7.40204700 | -2.08469600 | -2.15306500 |
| H | -7.40203400 | -2.08468100 | 2.15307900  |
| H | -8.10930800 | -3.11986000 | 0.00001400  |

Total energy = -2937.6019 a.u.

Lowest frequency = 20.2 cm<sup>-1</sup>

Geometry of 2-PhCH<sub>2</sub>C<sub>70</sub><sup>-</sup>

-1 1

|   |             |             |             |
|---|-------------|-------------|-------------|
| C | 2.69592300  | 1.99560300  | -1.26386200 |
| C | 2.25978900  | 2.85273800  | -0.19292000 |
| C | 2.58477200  | 2.21325800  | 1.07231500  |
| C | 3.23159500  | 0.95421600  | 0.79903500  |
| C | -4.50118000 | -1.43865200 | -1.15501100 |
| C | -3.92762200 | -2.63517700 | -0.55384800 |
| C | -3.97829400 | -2.47420200 | 0.89280400  |
| C | -4.59869300 | -1.18219800 | 1.18498400  |
| C | -4.92095200 | -0.54440000 | -0.07648800 |
| C | 1.89451800  | 1.86341800  | -2.39143600 |
| C | 1.08476800  | 3.62427600  | -0.30853200 |
| C | 1.71992500  | 2.36834800  | 2.17557300  |
| C | 2.91143300  | -0.14646700 | 1.58551200  |
| C | 3.06348100  | -0.49251200 | -1.25452200 |
| C | -3.93488700 | -0.90771100 | -2.31957200 |
| C | -2.81394000 | -3.24695100 | -1.14774500 |
| C | -2.91404700 | -2.92943600 | 1.67916300  |

|   |             |             |             |
|---|-------------|-------------|-------------|
| C | -4.11279300 | -0.41177800 | 2.25363100  |
| C | -4.74553800 | 0.84124100  | -0.22395000 |
| C | 1.65708300  | 0.55879800  | -3.01413600 |
| C | 0.26921400  | 3.49406700  | -1.48797900 |
| C | 0.48680200  | 3.13152700  | 2.03426700  |
| C | 1.98811200  | -0.01093600 | 2.70079600  |
| C | 2.71503100  | -1.57867800 | -0.40228500 |
| C | -3.75349600 | 0.53023200  | -2.46086700 |
| C | -2.23139100 | -2.68970100 | -2.35675200 |
| C | -1.75933800 | -3.55812700 | 1.05729100  |
| C | -3.00839000 | -0.89040600 | 3.06510000  |
| C | -4.24521200 | 1.63491000  | 0.88621300  |
| C | -2.77617000 | -1.54296300 | -2.92701100 |
| C | -4.15662200 | 1.38427200  | -1.43402500 |
| C | -3.93608600 | 1.02231900  | 2.09749500  |
| C | -2.41508000 | -2.12114200 | 2.78271200  |
| C | -1.71292800 | -3.71760000 | -0.32462400 |
| C | 0.65824300  | 2.62083000  | -2.50497300 |
| C | 2.20978000  | -0.57343200 | -2.39064900 |
| C | 2.67956500  | -1.46833400 | 0.99705100  |
| C | 1.41457600  | 1.22617700  | 2.99741800  |
| C | 0.17763100  | 3.74381200  | 0.82468500  |
| C | 0.29541500  | 0.52831200  | -3.47856900 |
| C | -1.13229500 | 3.55519900  | -1.09830700 |
| C | -0.56008300 | 2.47177200  | 2.79760600  |
| C | 1.20674100  | -1.22089600 | 2.80526500  |
| C | 1.70713000  | -2.41801900 | -1.06341600 |
| C | -2.51383100 | 0.77470800  | -3.17165400 |
| C | -0.78446900 | -2.83832600 | -2.28663300 |

|   |             |             |             |
|---|-------------|-------------|-------------|
| C | -0.56362800 | -3.15701600 | 1.78515200  |
| C | -2.16860800 | 0.24401100  | 3.41772100  |
| C | -3.37362500 | 2.67646900  | 0.35966400  |
| C | -1.90152300 | -0.50632200 | -3.45703400 |
| C | -3.31458400 | 2.51394300  | -1.07161400 |
| C | -2.74336300 | 1.42777100  | 2.82917500  |
| C | -0.97517500 | -2.27280000 | 2.85543900  |
| C | -0.46486200 | -3.47225500 | -1.03355700 |
| C | -0.32207000 | 1.80709900  | -3.18353900 |
| C | 1.39128900  | -1.79108900 | -2.30354600 |
| C | 1.62645100  | -2.10915200 | 1.73901200  |
| C | 0.01248800  | 1.28804700  | 3.38529200  |
| C | -1.18977700 | 3.71857300  | 0.33154100  |
| C | -0.49297200 | -0.66962400 | -3.48319300 |
| C | -2.13259900 | 2.82545100  | -1.80305300 |
| C | -1.92388300 | 2.50060400  | 2.38025900  |
| C | -0.13785700 | -1.20095800 | 3.27594400  |
| C | 0.73521700  | -3.15967200 | -0.33502500 |
| C | -1.71216200 | 1.91707500  | -2.89013600 |
| C | 0.08864300  | -1.87737800 | -2.87010300 |
| C | 0.68381500  | -3.00122800 | 1.12920000  |
| C | -0.75951900 | 0.10582500  | 3.57547800  |
| C | -2.25187900 | 3.15029700  | 1.09512800  |
| C | 3.58282200  | 0.84150200  | -0.71233500 |
| C | 5.10245100  | 1.11662500  | -1.02646300 |
| H | 5.20045600  | 1.12709600  | -2.11894000 |
| H | 5.33512100  | 2.12749200  | -0.66790800 |
| C | 6.07443400  | 0.12283800  | -0.42993300 |
| C | 6.68367300  | 0.36917400  | 0.81311300  |

|   |            |             |             |
|---|------------|-------------|-------------|
| C | 6.38668900 | -1.07345500 | -1.10056000 |
| C | 7.58022600 | -0.54899400 | 1.37010000  |
| H | 6.44773300 | 1.28565100  | 1.34652800  |
| C | 7.28149600 | -1.99461400 | -0.54587400 |
| H | 5.91471300 | -1.28265800 | -2.05523900 |
| C | 7.88324300 | -1.73505600 | 0.69113600  |
| H | 8.03902000 | -0.33941400 | 2.33215700  |
| H | 7.50638400 | -2.91447200 | -1.07798400 |
| H | 8.57831700 | -2.44977400 | 1.12215100  |

Total energy = -2937.6136 a.u.

Lowest frequency = 21.9 cm<sup>-1</sup>

Geometry of 5-PhCH<sub>2</sub>C<sub>70</sub><sup>-</sup>

-1 1

|   |             |             |             |
|---|-------------|-------------|-------------|
| C | -2.01010100 | 2.92313900  | 1.26079400  |
| C | -0.93714600 | 3.79137500  | 0.80335000  |
| C | -0.96502100 | 3.82059800  | -0.65710600 |
| C | -2.05238100 | 2.98720200  | -1.10568100 |
| C | 2.96136200  | -3.27312400 | 1.12382800  |
| C | 2.27466400  | -3.79281700 | -0.05062400 |
| C | 2.92483900  | -3.23517200 | -1.23181100 |
| C | 4.02366900  | -2.38259500 | -0.78537600 |
| C | 4.04020600  | -2.40150400 | 0.66898200  |
| C | -1.81733400 | 2.10610700  | 2.38467100  |
| C | 0.28484600  | 3.80835600  | 1.48976400  |
| C | 0.25942300  | 3.86419100  | -1.36751400 |
| C | -1.86521800 | 2.13881100  | -2.21000900 |

|   |             |             |             |
|---|-------------|-------------|-------------|
| C | 2.22557500  | -2.93232200 | 2.26641900  |
| C | 0.88186900  | -3.94542400 | -0.03318900 |
| C | 2.15381500  | -2.85816400 | -2.33529600 |
| C | 4.28569400  | -1.18781300 | -1.46975100 |
| C | 4.33181300  | -1.22786400 | 1.38072900  |
| C | -2.28401600 | 0.74090800  | 2.36106700  |
| C | 0.48536200  | 2.94287300  | 2.64228900  |
| C | 1.52158300  | 3.84773200  | -0.64031500 |
| C | -0.59553100 | 2.18039000  | -2.94783700 |
| C | 2.52647100  | -1.71046500 | 2.99408700  |
| C | 0.12364300  | -3.58420700 | 1.15327000  |
| C | 0.70738600  | -3.01304600 | -2.30886900 |
| C | 3.49790000  | -0.80347800 | -2.62522000 |
| C | 4.60721100  | 0.00630700  | 0.67010500  |
| C | 0.77953400  | -3.08748000 | 2.27553100  |
| C | 3.55249500  | -0.87679200 | 2.55957900  |
| C | 4.58239700  | 0.03061300  | -0.72420200 |
| C | 2.43389400  | -1.61359300 | -3.04139000 |
| C | 0.08602400  | -3.54945500 | -1.18366300 |
| C | -0.54109100 | 2.11340900  | 3.08251900  |
| C | -2.91737600 | 0.25677100  | 1.21657300  |
| C | 0.43663600  | 3.02811500  | -2.52583500 |
| C | 1.53596700  | 3.83021800  | 0.75156500  |
| C | -1.30933300 | -0.09181000 | 3.05839600  |
| C | 1.85488900  | 2.45140300  | 2.62072300  |
| C | 2.48640700  | 3.05000000  | -1.38211300 |
| C | -0.31678100 | 0.86332400  | -3.41703000 |
| C | -2.69287800 | -1.09704700 | -0.67591000 |
| C | 1.27611100  | -1.13192300 | 3.46769900  |

|   |             |             |             |
|---|-------------|-------------|-------------|
| C | -1.13759000 | -2.99057000 | 0.73083900  |
| C | 0.10539100  | -1.89418800 | -3.01369400 |
| C | 3.31179700  | 0.63533800  | -2.58711800 |
| C | 4.01680300  | 1.11016300  | 1.41399300  |
| C | 0.20024500  | -1.98008500 | 3.02023200  |
| C | 3.37128000  | 0.56625600  | 2.58212000  |
| C | 3.99635800  | 1.15563000  | -1.42512300 |
| C | 1.19074400  | -1.03643300 | -3.48551200 |
| C | -1.15677700 | -2.96676400 | -0.71068400 |
| C | -0.23931700 | 0.75463800  | 3.50916800  |
| C | -2.62340500 | -1.08937200 | 0.74040500  |
| C | -1.40638400 | 0.00548500  | -2.93397100 |
| C | 1.80202000  | 2.52701600  | -2.54049800 |
| C | 2.49985100  | 2.99411800  | 1.45289600  |
| C | -1.07117700 | -1.43953600 | 2.67391700  |
| C | 2.19241700  | 1.15967200  | 3.11893100  |
| C | 3.49201300  | 2.28989900  | -0.72345000 |
| C | 1.01468100  | 0.37420000  | -3.53075800 |
| C | -1.81883800 | -1.93158000 | -1.43111100 |
| C | 1.10336200  | 0.27566900  | 3.58026100  |
| C | -1.75732800 | -1.96196800 | 1.47694700  |
| C | -1.15307200 | -1.37868700 | -2.63164500 |
| C | 2.11967300  | 1.24463900  | -3.07716800 |
| C | 3.50328200  | 2.26300300  | 0.75364000  |
| C | -2.70273000 | 2.40634800  | 0.09106100  |
| C | -3.18456300 | 1.10425900  | 0.08476700  |
| C | -3.29014600 | 0.23251600  | -1.19504800 |
| C | -4.76422300 | 0.08881100  | -1.74492500 |
| H | -5.05420100 | 1.08200400  | -2.10835400 |

|   |             |             |             |
|---|-------------|-------------|-------------|
| H | -4.70659400 | -0.56856000 | -2.62076400 |
| C | -5.79653600 | -0.42948100 | -0.76848600 |
| C | -6.51465000 | 0.45483600  | 0.05664500  |
| C | -6.05760500 | -1.80659100 | -0.65331400 |
| C | -7.46397500 | -0.02023300 | 0.96765700  |
| H | -6.32100300 | 1.52113100  | -0.01567900 |
| C | -7.00630800 | -2.28609100 | 0.25636700  |
| H | -5.50898300 | -2.50406200 | -1.27975200 |
| C | -7.71392300 | -1.39385600 | 1.07049300  |
| H | -8.00619100 | 0.68041500  | 1.59613700  |
| H | -7.19127500 | -3.35392700 | 0.32979900  |
| H | -8.45038000 | -1.76461500 | 1.77741500  |
| C | -2.35907900 | 0.79512500  | -2.25416800 |

Total energy = -2937.6069 a.u.

Lowest frequency = 19.7 cm<sup>-1</sup>

Geometry of 7-PhCH<sub>2</sub>C<sub>70</sub><sup>-</sup>

-1 1

|   |             |             |             |
|---|-------------|-------------|-------------|
| C | -2.00180100 | 2.98629500  | -1.19822300 |
| C | -2.64850400 | 2.49569200  | -0.00254800 |
| C | -1.94345000 | 3.06131700  | 1.15628100  |
| C | -0.86591400 | 3.89703900  | 0.66394400  |
| C | 2.84985200  | -3.31347700 | -1.11060800 |
| C | 3.95647100  | -2.45799700 | -0.69859500 |
| C | 3.98237600  | -2.41848900 | 0.75863900  |
| C | 2.89409600  | -3.24186700 | 1.25146300  |
| C | 2.18430300  | -3.79307900 | 0.09492500  |

|   |             |             |             |
|---|-------------|-------------|-------------|
| C | -1.85306800 | 2.12926100  | -2.29848200 |
| C | -3.10838700 | 1.17320400  | 0.03305500  |
| C | -1.75061200 | 2.27020100  | 2.29124000  |
| C | 0.37124300  | 3.91219600  | 1.33922600  |
| C | 0.30671200  | 3.81340700  | -1.51438700 |
| C | 2.09302200  | -2.97944500 | -2.23956600 |
| C | 4.25319000  | -1.30403700 | -1.43722400 |
| C | 4.30403400  | -1.21589600 | 1.41572300  |
| C | 2.15508600  | -2.83197900 | 2.36957500  |
| C | 0.79330000  | -3.90897700 | 0.12039800  |
| C | -0.60520500 | 2.09774800  | -3.03364800 |
| C | -2.25213200 | 0.90615200  | 2.34319700  |
| C | 0.56798600  | 3.10503900  | 2.52058100  |
| C | 1.57967500  | 3.82026800  | -0.81419800 |
| C | 0.64448900  | -3.10320800 | -2.20610300 |
| C | 3.45095900  | -0.95462300 | -2.60001000 |
| C | 4.59386100  | -0.01750400 | 0.63835400  |
| C | 2.49127200  | -1.58043300 | 3.04638400  |
| C | 0.02309200  | -3.48861800 | 1.29240400  |
| C | 2.39697400  | -1.77409600 | -2.99370900 |
| C | 0.01322500  | -3.54795400 | -1.04783400 |
| C | 0.71267100  | -2.96821900 | 2.40644000  |
| C | 3.54973600  | -0.79634200 | 2.57456000  |
| C | 4.57175300  | -0.06236400 | -0.75282400 |
| C | -2.36031100 | 0.76893500  | -2.24588500 |
| C | 0.45130100  | 2.91952100  | -2.65330400 |
| C | 1.61216200  | 3.86445500  | 0.57690700  |
| C | -0.47094300 | 2.28822600  | 2.98925100  |
| C | -2.89153200 | 0.35248800  | 1.21930600  |



|   |             |             |             |
|---|-------------|-------------|-------------|
| C | -0.34840700 | 0.72234500  | -3.44957500 |
| C | -1.29759600 | 0.10528500  | 3.05234900  |
| C | 1.92152500  | 2.57301100  | 2.49758500  |
| C | 2.50521800  | 2.95426400  | -1.53029800 |
| C | 0.06602600  | -2.00144800 | -2.94034700 |
| C | 3.29379100  | 0.49076300  | -2.63839300 |
| C | 4.05219100  | 1.13599800  | 1.33705800  |
| C | 1.27436900  | -0.96537400 | 3.51108900  |
| C | -1.22586200 | -2.94411700 | 0.86721800  |
| C | 1.14414700  | -1.17803800 | -3.43495900 |
| C | -1.22857100 | -2.93686000 | -0.60681600 |
| C | 0.17429700  | -1.81288900 | 3.07990600  |
| C | 3.39241400  | 0.65062200  | 2.52327900  |
| C | 3.98350500  | 1.04099500  | -1.49973100 |
| C | -1.42042900 | -0.09382500 | -2.97761500 |
| C | 1.81254800  | 2.40331600  | -2.66561800 |
| C | 2.57600800  | 3.05505700  | 1.30479000  |
| C | -0.19827400 | 0.96123200  | 3.48057400  |
| C | -2.70662900 | -1.00210000 | 0.83973300  |
| C | 0.99136800  | 0.22546300  | -3.56185600 |
| C | -1.85785400 | -1.94777100 | -1.36339500 |
| C | -1.08826400 | -1.26246700 | 2.71413200  |
| C | 2.23175200  | 1.29310100  | 3.04546400  |
| C | 3.51392100  | 2.21602600  | -0.84599500 |
| C | -1.18770900 | -1.43847600 | -2.55209800 |
| C | 2.10764200  | 1.09587700  | -3.14873700 |
| C | 3.54835200  | 2.26574400  | 0.62926500  |
| C | 1.12779500  | 0.45214300  | 3.55325900  |
| C | -1.81625700 | -1.83419100 | 1.55970600  |

|   |             |             |             |
|---|-------------|-------------|-------------|
| C | -0.89317800 | 3.84584900  | -0.79256000 |
| C | -3.01117400 | 0.30938900  | -1.11603600 |
| C | -3.00446600 | -1.17053300 | -0.68306000 |
| C | -4.36324200 | -1.91866400 | -0.99361300 |
| H | -4.44917500 | -1.98607200 | -2.08541900 |
| H | -4.24750200 | -2.94129200 | -0.61547500 |
| C | -5.61118800 | -1.28847600 | -0.41715400 |
| C | -6.36174000 | -0.36322300 | -1.16421600 |
| C | -6.04844100 | -1.60902400 | 0.88038900  |
| C | -7.51560800 | 0.22326900  | -0.63366000 |
| H | -6.03363400 | -0.10051000 | -2.16595600 |
| C | -7.20186400 | -1.02454100 | 1.41462700  |
| H | -5.47563700 | -2.31591700 | 1.47286500  |
| C | -7.94056200 | -0.10666400 | 0.65874000  |
| H | -8.08013400 | 0.93649900  | -1.22732400 |
| H | -7.52131400 | -1.28407400 | 2.41974100  |
| H | -8.83580800 | 0.34793400  | 1.07277000  |

Total energy = -2937.6095 a.u.

Lowest frequency = 21.9 cm<sup>-1</sup>

Geometry of 21-PhCH<sub>2</sub>C<sub>70</sub><sup>-</sup>

-1 1

|   |             |             |             |
|---|-------------|-------------|-------------|
| C | -3.32380500 | -3.19136800 | 0.03201400  |
| C | -2.52257600 | -3.50671200 | -1.14428200 |
| C | -1.22707000 | -3.99838700 | -0.68618800 |
| C | -1.23016700 | -4.00187300 | 0.76903300  |
| C | -0.47353000 | 4.24557900  | -0.02350400 |

|   |             |             |             |
|---|-------------|-------------|-------------|
| C | 0.32874600  | 3.94772300  | 1.15809100  |
| C | 1.62924800  | 3.45964700  | 0.71314600  |
| C | 1.62278900  | 3.43576300  | -0.74143200 |
| C | 0.32809500  | 3.92904000  | -1.19947900 |
| C | -4.16091200 | -2.06782400 | 0.02175700  |
| C | -2.59367100 | -2.68441400 | -2.27426000 |
| C | -0.06763200 | -3.64074800 | -1.38098900 |
| C | -0.05858400 | -3.62168900 | 1.44586000  |
| C | -2.60316500 | -2.65343800 | 2.33426500  |
| C | -1.84706200 | 3.96954200  | -0.02343700 |
| C | -0.28573600 | 3.39416300  | 2.28915900  |
| C | 2.24862600  | 2.40173500  | 1.39962800  |
| C | 2.24333100  | 2.38469700  | -1.42500100 |
| C | -0.27962300 | 3.34971600  | -2.31902400 |
| C | -4.23033700 | -1.19625400 | 1.18348300  |
| C | -0.14920700 | -2.77607400 | -2.53328600 |
| C | 1.15218400  | -3.27591200 | 0.73142100  |
| C | -1.38880800 | -2.27119800 | 3.03966200  |
| C | -2.47127100 | 3.36270100  | -1.18877000 |
| C | -1.70855700 | 3.09717500  | 2.27608400  |
| C | 1.59353700  | 1.82255800  | 2.56604300  |
| C | 2.90297100  | 1.29325200  | -0.70306000 |
| C | 0.37138400  | 2.25259100  | -3.01770600 |
| C | -2.47570000 | 3.38306900  | 1.14916700  |
| C | -1.70476100 | 3.05821300  | -2.30957700 |
| C | 1.59963500  | 1.78046500  | -2.56593100 |
| C | 2.91247600  | 1.32607100  | 0.69513300  |
| C | 0.36581800  | 2.30741100  | 3.00549200  |
| C | -4.22559300 | -1.21451000 | -1.15435600 |

|   |             |             |             |
|---|-------------|-------------|-------------|
| C | -3.46371000 | -1.48203800 | 2.31070700  |
| C | -0.15325900 | -2.73698000 | 2.60057300  |
| C | 1.15524500  | -3.25772700 | -0.66854900 |
| C | -1.38024600 | -2.31280100 | -2.98530200 |
| C | -4.35556800 | 0.17855800  | 0.72446800  |
| C | 1.01870300  | -1.89622100 | -2.51950600 |
| C | 1.79518500  | -2.16078900 | 1.43302600  |
| C | -1.52173600 | -0.88742400 | 3.47165900  |
| C | -3.48836600 | 2.42646100  | -0.73246700 |
| C | -1.93470800 | 1.85968500  | 3.00920100  |
| C | 1.85285100  | 0.39632400  | 2.57147400  |
| C | 2.73888300  | 0.06189900  | -1.43748200 |
| C | -3.48931000 | 2.43761600  | 0.70738100  |
| C | -1.92230300 | 1.80624300  | -3.02064900 |
| C | 1.88444900  | 0.34573600  | -2.53725100 |
| C | 2.65055700  | 0.07692600  | 1.41582800  |
| C | -0.65556000 | 1.37232600  | 3.45462900  |
| C | -4.35487400 | 0.16749900  | -0.71561500 |
| C | -2.80101300 | -0.40084400 | 3.02610300  |
| C | 0.99277900  | -1.84968000 | 2.58873400  |
| C | 1.84349500  | -2.23693200 | -1.41552700 |
| C | -1.50911400 | -0.94258800 | -3.44312800 |
| C | -3.79595000 | 1.26519000  | 1.45812100  |
| C | -2.97753500 | 0.92084300  | -2.65559500 |
| C | -0.39170500 | -0.02396800 | 3.56153100  |
| C | -3.78608800 | 1.23949700  | -1.46319500 |
| C | -2.98323700 | 0.96250400  | 2.65192700  |
| C | 0.91269900  | -0.52735900 | 3.10261800  |
| C | -0.36341800 | -0.08737600 | -3.52576000 |

|   |             |             |             |
|---|-------------|-------------|-------------|
| C | -2.52127500 | -3.49029000 | 1.21354000  |
| C | -3.45851900 | -1.51491400 | -2.27578100 |
| C | -2.78644400 | -0.44755300 | -3.00371300 |
| C | -0.64325200 | 1.31481900  | -3.45937000 |
| C | 2.90069800  | -1.31853600 | -0.77626800 |
| C | 4.33951400  | -1.95227800 | -0.98042600 |
| H | 4.30698000  | -2.95668600 | -0.53871900 |
| H | 4.46310100  | -2.07864700 | -2.06283600 |
| C | 0.93802400  | -0.58255700 | -3.08346200 |
| C | 5.50653700  | -1.17586100 | -0.41522400 |
| C | 6.15576400  | -0.19027700 | -1.18151700 |
| C | 5.97230600  | -1.41576800 | 0.89051500  |
| C | 7.23240800  | 0.53445200  | -0.65982200 |
| H | 5.80567200  | 0.00964300  | -2.18956000 |
| C | 7.04927700  | -0.69374800 | 1.41542000  |
| H | 5.48157600  | -2.17156200 | 1.49674000  |
| C | 7.68415800  | 0.28495800  | 0.64151100  |
| H | 7.71654800  | 1.29336300  | -1.26793100 |
| H | 7.39126400  | -0.89448100 | 2.42681800  |
| H | 8.52022200  | 0.84682400  | 1.04788100  |
| C | 2.56169300  | -1.17581300 | 0.76875600  |

Total energy = -2937.5831 a.u.

Lowest frequency = 18.8 cm<sup>-1</sup>

## Geometry of **2**

0 1

|   |            |             |            |
|---|------------|-------------|------------|
| C | 2.58952800 | -3.49234200 | 1.19536100 |
|---|------------|-------------|------------|

|   |             |             |             |
|---|-------------|-------------|-------------|
| C | 1.25538300  | -3.98265600 | 0.87279200  |
| C | 1.13476800  | -4.03164700 | -0.58013600 |
| C | 2.38759300  | -3.58390200 | -1.15459400 |
| C | 3.28974900  | -3.24277100 | -0.06015800 |
| C | -0.17846900 | 3.98336000  | 1.13322100  |
| C | 0.52929200  | 4.23594500  | -0.11754700 |
| C | -0.36610100 | 3.89102700  | -1.21481100 |
| C | -1.62224000 | 3.42249100  | -0.63847300 |
| C | -1.51009600 | 3.48633900  | 0.80474000  |
| C | 2.76409800  | -2.61881200 | 2.27454600  |
| C | 0.16346900  | -3.58400400 | 1.64691300  |
| C | -0.07523200 | -3.66555800 | -1.19599100 |
| C | 2.36193100  | -2.78876700 | -2.30677400 |
| C | 4.12653600  | -2.12842000 | -0.17537600 |
| C | 0.51213500  | 3.44093900  | 2.22136700  |
| C | 1.89337900  | 3.93900400  | -0.21683600 |
| C | 0.14526500  | 3.27457200  | -2.35906500 |
| C | -2.30706500 | 2.34599900  | -1.22898400 |
| C | -2.08057600 | 2.46682400  | 1.57555300  |
| C | 3.63549100  | -1.46182800 | 2.14537100  |
| C | 0.35004000  | -2.67719800 | 2.76839400  |
| C | -1.19883600 | -3.23657700 | -0.38262900 |
| C | 1.10209400  | -2.43771300 | -2.93362000 |
| C | 4.09986400  | -1.31112300 | -1.37961900 |
| C | -0.09154800 | 2.38779700  | 3.02466300  |
| C | 2.60307500  | 3.37423300  | 0.91982200  |
| C | 1.56375100  | 2.97004400  | -2.45925100 |
| C | -1.75778600 | 1.70305900  | -2.40841200 |
| C | -2.79626300 | 1.37467900  | 0.94346800  |

|   |             |             |             |
|---|-------------|-------------|-------------|
| C | 1.92732100  | 3.13077800  | 2.11107000  |
| C | -1.35596300 | 1.91181900  | 2.70493200  |
| C | -2.93676500 | 1.32914500  | -0.42751100 |
| C | -0.56938900 | 2.16478500  | -2.96992200 |
| C | 2.42024600  | 3.29483000  | -1.41035300 |
| C | 1.62309900  | -2.20485800 | 3.07699100  |
| C | 4.30114400  | -1.22266300 | 0.94750800  |
| C | 3.23521900  | -1.63368700 | -2.41695500 |
| C | -0.08937500 | -2.89417800 | -2.41027900 |
| C | -1.08788400 | -3.21130200 | 1.00607200  |
| C | 3.04291700  | -0.35267800 | 2.87789100  |
| C | -0.78949300 | -1.77764200 | 2.82728700  |
| C | -1.94598900 | -2.21941700 | -1.07801600 |
| C | 1.21710000  | -1.06084100 | -3.43872300 |
| C | 4.28283800  | 0.08315300  | -0.99511600 |
| C | 0.95496000  | 1.45410300  | 3.42294900  |
| C | 3.57072400  | 2.40590700  | 0.42589500  |
| C | 1.71401700  | 1.69898100  | -3.14796500 |
| C | -2.05632500 | 0.29449500  | -2.37425300 |
| C | -2.51271100 | 0.14933900  | 1.70486100  |
| C | 2.19435300  | 1.91131100  | 2.85998200  |
| C | -1.63908500 | 0.48323200  | 2.78019500  |
| C | 0.38860200  | 1.20504100  | -3.45448300 |
| C | 3.45339500  | 2.35532800  | -1.01030900 |
| C | 1.80077400  | -0.81196100 | 3.44875300  |
| C | 4.40461900  | 0.13610300  | 0.43469900  |
| C | 2.52154400  | -0.57838200 | -3.12664500 |
| C | -1.67017400 | -2.10999700 | 1.72765800  |
| C | 3.20440400  | 0.99238100  | 2.44673900  |

|   |             |             |             |
|---|-------------|-------------|-------------|
| C | -0.65715600 | -0.44014900 | 3.26846600  |
| C | -2.57897400 | -1.19481400 | -0.40152000 |
| C | 0.09127700  | -0.18543100 | -3.45923300 |
| C | 3.67456600  | 1.14345100  | -1.72663200 |
| C | 0.68760100  | 0.06561200  | 3.59709000  |
| C | 3.91511500  | 1.25030800  | 1.17943200  |
| C | 2.76456200  | 0.80433700  | -2.83509800 |
| C | -1.19031000 | -0.63698600 | -2.90901800 |
| C | -2.43517300 | -1.11739600 | 1.05545700  |
| C | -1.40455200 | -2.10749800 | -2.52861100 |
| H | -2.08157100 | -2.58664700 | -3.25306300 |
| C | -3.06681100 | 0.01381900  | -1.22058600 |
| C | -4.52397200 | -0.20923800 | -1.78942200 |
| H | -4.75576100 | 0.65351300  | -2.42481600 |
| H | -4.48267500 | -1.08974700 | -2.44119300 |
| C | -5.60533500 | -0.39026000 | -0.74410000 |
| C | -5.96108500 | -1.67247600 | -0.29040800 |
| C | -6.27935000 | 0.72197100  | -0.21015100 |
| C | -6.95894600 | -1.83899300 | 0.67562700  |
| H | -5.45629300 | -2.54302100 | -0.69925100 |
| C | -7.27777800 | 0.55852300  | 0.75578400  |
| H | -6.02329000 | 1.71911900  | -0.55653900 |
| C | -7.61976700 | -0.72319000 | 1.20236400  |
| H | -7.22217900 | -2.83679700 | 1.01239000  |
| H | -7.78969800 | 1.42866400  | 1.15462300  |
| H | -8.39612300 | -0.85132000 | 1.94989100  |

Total energy = -2938.1227 a.u.

Lowest frequency = 20.3 cm<sup>-1</sup>



## Geometry of 4

0 1

|   |             |             |             |
|---|-------------|-------------|-------------|
| C | 2.71512200  | 1.93756300  | -1.19843100 |
| C | 2.27760700  | 2.81538700  | -0.14295700 |
| C | 2.57033400  | 2.17597700  | 1.12790200  |
| C | 3.19607800  | 0.90321300  | 0.86122000  |
| C | -4.52438300 | -1.39542500 | -1.21927000 |
| C | -3.97346300 | -2.59731300 | -0.60205400 |
| C | -4.05074600 | -2.43324500 | 0.84564300  |
| C | -4.65179200 | -1.13368200 | 1.12057900  |
| C | -4.94400200 | -0.49322500 | -0.15377900 |
| C | 1.94469200  | 1.81884100  | -2.33896700 |
| C | 1.11354000  | 3.59051300  | -0.28433300 |
| C | 1.68557400  | 2.33744000  | 2.20831100  |
| C | 2.85875600  | -0.18371600 | 1.64590400  |
| C | -3.93533300 | -0.87714800 | -2.37766500 |
| C | -2.86071600 | -3.22275900 | -1.17200200 |
| C | -3.01065300 | -2.90340600 | 1.65419600  |
| C | -4.18041000 | -0.36486800 | 2.19210300  |
| C | -4.75129300 | 0.88674900  | -0.29759400 |
| C | 1.68613200  | 0.49768600  | -2.94473100 |
| C | 0.32072500  | 3.46872200  | -1.48090600 |
| C | 0.46820600  | 3.11876300  | 2.04667500  |
| C | 1.92140600  | -0.03899900 | 2.74238200  |
| C | 2.67613700  | -1.66686800 | -0.31939900 |
| C | -3.73209300 | 0.55660100  | -2.51722200 |
| C | -2.24939200 | -2.67682900 | -2.37461000 |

|   |             |             |             |
|---|-------------|-------------|-------------|
| C | -1.85304600 | -3.54801100 | 1.05477900  |
| C | -3.09391700 | -0.85630000 | 3.02284000  |
| C | -4.25984400 | 1.67794300  | 0.81837100  |
| C | -2.77388600 | -1.52906900 | -2.96150700 |
| C | -4.12988200 | 1.41639100  | -1.49945400 |
| C | -3.98080600 | 1.06618900  | 2.03504000  |
| C | -2.52196000 | -2.09658600 | 2.76148500  |
| C | -1.77997600 | -3.70656200 | -0.32611200 |
| C | 0.72372900  | 2.58726500  | -2.48287800 |
| C | 2.20840700  | -0.63661000 | -2.37361200 |
| C | 2.59987300  | -1.50516200 | 1.04155100  |
| C | 1.35448400  | 1.20150100  | 3.02972500  |
| C | 0.18916700  | 3.73065300  | 0.83062400  |
| C | 0.32539500  | 0.49619500  | -3.45125700 |
| C | -1.08729900 | 3.55220600  | -1.11822700 |
| C | -0.59938600 | 2.46987600  | 2.79177900  |
| C | 1.11340500  | -1.24085300 | 2.83399200  |
| C | 1.67166200  | -2.44349600 | -0.99720700 |
| C | -2.46664600 | 0.78040000  | -3.20082700 |
| C | -0.80874400 | -2.84096200 | -2.27363800 |
| C | -0.66874800 | -3.15783400 | 1.80312400  |
| C | -2.24660200 | 0.26967700  | 3.39041100  |
| C | -3.36337600 | 2.70391900  | 0.30189600  |
| C | -1.87870200 | -0.50465000 | -3.47570600 |
| C | -3.28159000 | 2.53957000  | -1.12582400 |
| C | -2.79402800 | 1.45543500  | 2.78536800  |
| C | -1.07913700 | -2.26251700 | 2.85338000  |
| C | -0.51990700 | -3.47494600 | -1.01200200 |
| C | -0.26338100 | 1.77833900  | -3.17323800 |

|   |             |             |             |
|---|-------------|-------------|-------------|
| C | 1.38417200  | -1.81147100 | -2.25732900 |
| C | 1.52594200  | -2.13614200 | 1.78715900  |
| C | -0.05273100 | 1.28344100  | 3.39550700  |
| C | -1.16850700 | 3.71754700  | 0.30897100  |
| C | -0.46657400 | -0.68697000 | -3.47093200 |
| C | -2.08444100 | 2.83447000  | -1.83733600 |
| C | -1.95330900 | 2.51696100  | 2.34909200  |
| C | -0.23633500 | -1.20171100 | 3.28945800  |
| C | 0.66933900  | -3.17571600 | -0.29165400 |
| C | -1.65766000 | 1.91530400  | -2.91139000 |
| C | 0.08493900  | -1.89322700 | -2.84450600 |
| C | 0.59545200  | -3.01585200 | 1.16435500  |
| C | -0.84373000 | 0.11354900  | 3.57575700  |
| C | -2.24959600 | 3.16663400  | 1.05638200  |
| C | 3.59843900  | 0.80414200  | -0.62761100 |
| C | 5.11812500  | 1.16433200  | -0.87000500 |
| H | 5.25087100  | 1.27627200  | -1.95317800 |
| H | 5.28649700  | 2.15347700  | -0.42839200 |
| C | 6.13136100  | 0.17313700  | -0.33433100 |
| C | 6.44615200  | 0.12365100  | 1.03661800  |
| C | 6.79405000  | -0.71201700 | -1.20388200 |
| C | 7.38191700  | -0.79402400 | 1.52305700  |
| H | 5.95968600  | 0.80941400  | 1.72281700  |
| C | 7.73031500  | -1.63306400 | -0.71915100 |
| H | 6.58987800  | -0.66609300 | -2.27073200 |
| C | 8.02405800  | -1.67862700 | 0.64734700  |
| H | 7.61319800  | -0.81587100 | 2.58335900  |
| H | 8.23183800  | -2.30574100 | -1.40777500 |
| H | 8.75091900  | -2.38976200 | 1.02647400  |

|   |            |             |             |
|---|------------|-------------|-------------|
| C | 3.27251900 | -0.62496800 | -1.27058100 |
| H | 4.22198800 | -1.00983800 | -1.66575900 |

Total energy = -2938.1340 a.u.

Lowest frequency = 20.5 cm<sup>-1</sup>

### Geometry of **5**

0 1

|   |             |             |             |
|---|-------------|-------------|-------------|
| C | 0.50579500  | 4.23635600  | 0.04983500  |
| C | -0.34255500 | 3.93131400  | -1.09637100 |
| C | -1.60814300 | 3.43019400  | -0.59866200 |
| C | -1.56277300 | 3.43837100  | 0.84926400  |
| C | -0.25206400 | 3.93042800  | 1.25860000  |
| C | 3.30628600  | -3.22237800 | -0.08450800 |
| C | 2.54793500  | -3.52848500 | 1.12399500  |
| C | 1.23220500  | -4.01065500 | 0.72145100  |
| C | 1.17566500  | -3.99347800 | -0.73556000 |
| C | 2.46010500  | -3.51586800 | -1.23515600 |
| C | 1.87178600  | 3.94113300  | -0.00461100 |
| C | 0.21609200  | 3.34539900  | -2.23598100 |
| C | -2.26017800 | 2.37387600  | -1.27376900 |
| C | -2.15798200 | 2.38505600  | 1.54869900  |
| C | 0.39414400  | 3.34419400  | 2.35148000  |
| C | 4.14957100  | -2.10620600 | -0.11095100 |
| C | 2.66958100  | -2.70414500 | 2.24766800  |
| C | 0.10332400  | -3.65219400 | 1.46430800  |
| C | -0.00630600 | -3.60570100 | -1.37902900 |
| C | 2.50185500  | -2.68436400 | -2.35848900 |

|   |             |             |             |
|---|-------------|-------------|-------------|
| C | 2.53663900  | 3.33444100  | 1.13570300  |
| C | 1.63736200  | 3.05014400  | -2.28862800 |
| C | -1.69505600 | 1.81857400  | -2.47207100 |
| C | -2.83684000 | 1.31913000  | 0.83955300  |
| C | -0.23842400 | 2.25529500  | 3.08311600  |
| C | 4.18491400  | -1.24117200 | -1.27953800 |
| C | 3.54205000  | -1.54116700 | 2.21037700  |
| C | 0.23664300  | -2.79263400 | 2.63012600  |
| C | -1.17377300 | -3.22798900 | -0.60428100 |
| C | 1.26978600  | -2.29509500 | -3.02653500 |
| C | 4.26503200  | -1.24908900 | 1.05831700  |
| C | 3.37942100  | -1.52422200 | -2.37876600 |
| C | 0.04177900  | -2.74045000 | -2.54230700 |
| C | -1.12252500 | -3.25903500 | 0.78710900  |
| C | 1.49148900  | -2.32956600 | 3.01452600  |
| C | 2.44802000  | 3.34121300  | -1.19982900 |
| C | 1.81374300  | 3.04204200  | 2.28797800  |
| C | -1.48460400 | 1.78802400  | 2.68901600  |
| C | -2.91520700 | 1.32542800  | -0.53810800 |
| C | -0.47443700 | 2.27456500  | -2.92548100 |
| C | 3.53038200  | 2.38948900  | 0.64495600  |
| C | 1.82356000  | 1.80836800  | -3.02868400 |
| C | -2.59240800 | 0.06735200  | 1.56689000  |
| C | 0.79409200  | 1.30895200  | 3.48751200  |
| C | 4.33568800  | 0.13337400  | -0.83133200 |
| C | 2.91149100  | -0.46698100 | 2.96128200  |
| C | -0.90939700 | -1.89953400 | 2.67774800  |
| C | -1.87873500 | -2.15903200 | -1.28748200 |
| C | 1.39181300  | -0.92541800 | -3.46205600 |

|   |             |             |             |
|---|-------------|-------------|-------------|
| C | 4.38726300  | 0.12908100  | 0.60988700  |
| C | 2.69833900  | -0.44310100 | -3.07210900 |
| C | -1.73996300 | -2.18808700 | 1.52947700  |
| C | 1.64699900  | -0.95299400 | 3.45526900  |
| C | 3.47723200  | 2.39322200  | -0.79083000 |
| C | 2.05512700  | 1.79330700  | 2.99748900  |
| C | -1.76565600 | 0.35807900  | 2.69294300  |
| C | 0.53697300  | 1.33129600  | -3.42133900 |
| C | 3.85377300  | 1.20604400  | 1.37079800  |
| C | 2.89381300  | 0.91110300  | -2.71033300 |
| C | -1.03450700 | -0.56460000 | -3.03041800 |
| C | -2.48463700 | -1.16970000 | 0.86918000  |
| C | 0.52566800  | -0.08567900 | 3.59140300  |
| C | 3.74789400  | 1.21622200  | -1.54534000 |
| C | 3.08656900  | 0.89613800  | 2.59393300  |
| C | -0.80347100 | -0.58235200 | 3.18342200  |
| C | -2.56905900 | -1.17684800 | -0.59357600 |
| C | 0.25862600  | -0.06380100 | -3.50240000 |
| C | -3.06688600 | 0.04970700  | -1.37250400 |
| C | -1.10332700 | -1.85072700 | -2.52329700 |
| C | -4.55642500 | -0.17722900 | -1.85345300 |
| H | -4.83597200 | 0.70470200  | -2.44426700 |
| H | -4.53684000 | -1.03523400 | -2.53696000 |
| C | -2.18338300 | 0.39361100  | -2.71003900 |
| H | -2.88780000 | 0.36745900  | -3.55472700 |
| C | -5.58523400 | -0.41042700 | -0.76730200 |
| C | -6.25205300 | 0.67048100  | -0.16420200 |
| C | -5.90582900 | -1.71420400 | -0.34943800 |
| C | -7.20728300 | 0.45567900  | 0.83503400  |

|   |             |             |             |
|---|-------------|-------------|-------------|
| H | -6.02440600 | 1.68375000  | -0.48202200 |
| C | -6.86080500 | -1.93210200 | 0.64883400  |
| H | -5.40662300 | -2.56088300 | -0.81172500 |
| C | -7.51345400 | -0.84686800 | 1.24535400  |
| H | -7.71351600 | 1.30237400  | 1.28787500  |
| H | -7.09727300 | -2.94575500 | 0.95682900  |
| H | -8.25647600 | -1.01503300 | 2.01838900  |

Total energy = -2938.1173 a.u.

Lowest frequency = 22.3 cm<sup>-1</sup>

### Geometry of **6**

0 1

|   |             |             |             |
|---|-------------|-------------|-------------|
| C | 1.03366100  | 3.84424000  | 0.58547900  |
| C | 2.10825400  | 2.96677400  | 1.02929300  |
| C | 2.73068600  | 2.38163200  | -0.15487500 |
| C | 2.04898100  | 2.89665300  | -1.32315600 |
| C | 0.99432400  | 3.79909900  | -0.87121200 |
| C | -4.05715800 | -2.28390500 | 0.90326800  |
| C | -4.10158100 | -2.32476800 | -0.55462100 |
| C | -3.05079200 | -3.22762500 | -1.00986100 |
| C | -2.35685000 | -3.74369900 | 0.16306000  |
| C | -2.97752800 | -3.16090600 | 1.34414800  |
| C | -0.16285300 | 3.90052800  | 1.31327700  |
| C | 1.94191600  | 2.19155300  | 2.17910500  |
| C | 3.15312100  | 1.04417300  | -0.14044800 |
| C | 1.81506800  | 2.03685000  | -2.40186600 |
| C | -0.23917000 | 3.80959000  | -1.53095900 |

|   |             |             |             |
|---|-------------|-------------|-------------|
| C | -4.28618800 | -1.07668600 | 1.57020800  |
| C | -4.37664900 | -1.15552700 | -1.27241900 |
| C | -2.31523100 | -2.91373800 | -2.15960600 |
| C | -0.96903200 | -3.92590800 | 0.12382500  |
| C | -2.17787000 | -2.78151200 | 2.42818000  |
| C | -1.43878000 | 3.90593300  | 0.61879300  |
| C | 0.69888500  | 2.25255300  | 2.93252100  |
| C | 2.95900700  | 0.24098900  | 1.05348800  |
| C | 2.27616900  | 0.65983100  | -2.36894500 |
| C | -0.47328600 | 2.92432300  | -2.66037600 |
| C | -3.45183400 | -0.69077100 | 2.69785000  |
| C | -4.60979000 | 0.09724300  | -0.57220100 |
| C | -2.60257100 | -1.69193700 | -2.89418900 |
| C | -0.21058000 | -3.60381600 | -1.07566600 |
| C | -0.73689500 | -2.95482000 | 2.36394100  |
| C | -4.56697300 | 0.13695800  | 0.81725100  |
| C | -2.42043900 | -1.52247600 | 3.11389400  |
| C | -0.14802900 | -3.51294200 | 1.24266400  |
| C | -0.87548700 | -3.10173100 | -2.18635100 |
| C | -3.60957900 | -0.83505400 | -2.46667100 |
| C | -0.33251100 | 3.08798100  | 2.50710900  |
| C | -1.47709000 | 3.86353400  | -0.77116100 |
| C | 0.53027100  | 2.05574700  | -3.07871900 |
| C | 2.97111800  | 0.17902200  | -1.28021300 |
| C | 2.37991600  | 0.80613700  | 2.19252700  |
| C | -2.39203000 | 3.12230900  | 1.39173900  |
| C | 0.39337000  | 0.92095900  | 3.42201800  |
| C | 1.25741800  | -0.16820900 | -3.04031600 |
| C | -1.85182300 | 2.46230600  | -2.60891400 |



|   |             |             |             |
|---|-------------|-------------|-------------|
| C | -3.24472400 | 0.75154700  | 2.64698100  |
| C | -4.01516100 | 1.17888100  | -1.34466700 |
| C | -1.34857300 | -1.14081200 | -3.37974900 |
| C | 1.07869200  | -3.04834300 | -0.67893100 |
| C | -0.10522000 | -1.81849500 | 3.03155100  |
| C | -3.92955200 | 1.25677800  | 1.49043800  |
| C | -1.13702100 | -0.94656500 | 3.49743000  |
| C | -0.28176700 | -1.99498200 | -2.94057100 |
| C | -3.39996200 | 0.60496700  | -2.51113600 |
| C | -1.70609400 | 2.61687000  | 2.55562200  |
| C | -2.46891800 | 3.03745500  | -1.44321200 |
| C | 0.19649100  | 0.70135500  | -3.47551100 |
| C | 1.43804000  | 0.03016400  | 2.95484300  |
| C | -3.42396800 | 2.37662600  | 0.76110000  |
| C | -0.94274300 | 0.46928500  | 3.56019300  |
| C | 1.80916900  | -1.89908800 | 1.41825800  |
| C | 1.00419100  | -1.49021800 | -2.65358200 |
| C | -2.21965600 | 1.16867100  | -3.07713100 |
| C | -2.03811900 | 1.34928700  | 3.11384000  |
| C | -3.46762400 | 2.33274600  | -0.71208900 |
| C | -1.15435100 | 0.25824900  | -3.52857400 |
| C | 1.16097100  | -1.31948400 | 2.61137100  |
| C | 1.10755800  | -2.96388000 | 0.71119000  |
| C | 2.67971600  | -1.11105900 | 0.67043200  |
| C | 2.98502800  | -1.29878000 | -0.84027100 |
| C | 1.92742800  | -2.22799900 | -1.63767300 |
| H | 2.55154600  | -2.92092700 | -2.22445200 |
| C | 4.40006200  | -1.97257800 | -1.06182700 |
| H | 4.55646500  | -2.01918200 | -2.14718500 |

|   |            |             |             |
|---|------------|-------------|-------------|
| H | 4.31341500 | -3.00612700 | -0.70315900 |
| C | 5.58971300 | -1.30361700 | -0.40739400 |
| C | 6.31106600 | -0.30398600 | -1.08333900 |
| C | 6.00689900 | -1.67684900 | 0.88192400  |
| C | 7.41436900 | 0.31278400  | -0.48407300 |
| H | 6.00741300 | -0.00995000 | -2.08410900 |
| C | 7.11003200 | -1.06239600 | 1.48399800  |
| H | 5.46496500 | -2.45298000 | 1.41476300  |
| C | 7.81611900 | -0.06416400 | 0.80264300  |
| H | 7.96022000 | 1.08191200  | -1.02143900 |
| H | 7.41870500 | -1.36431900 | 2.47988000  |
| H | 8.67332700 | 0.41203300  | 1.26781200  |

Total energy = -2938.1031 a.u.

Lowest frequency = 23.5 cm<sup>-1</sup>

#### Geometry of 7

0 1

|   |             |             |             |
|---|-------------|-------------|-------------|
| C | 2.65706500  | 2.09204000  | -1.20554100 |
| C | 2.22071100  | 2.91708000  | -0.11082500 |
| C | 2.55786000  | 2.24143700  | 1.13259200  |
| C | 3.22440200  | 0.99597700  | 0.82659900  |
| C | -4.49124900 | -1.45812400 | -1.18773600 |
| C | -3.88973100 | -2.65836500 | -0.62143600 |
| C | -3.93813000 | -2.54445500 | 0.83179900  |
| C | -4.57193200 | -1.27454600 | 1.16505000  |
| C | -4.91100700 | -0.60143000 | -0.08216600 |
| C | 1.85635100  | 1.98759100  | -2.33128800 |

|   |             |             |             |
|---|-------------|-------------|-------------|
| C | 1.02626700  | 3.65711000  | -0.20286300 |
| C | 1.68826700  | 2.34165200  | 2.23058200  |
| C | 2.95247500  | -0.12019600 | 1.59082000  |
| C | -3.94231800 | -0.88520200 | -2.33999900 |
| C | -2.77026500 | -3.23153000 | -1.23639100 |
| C | -2.86307200 | -3.00644600 | 1.59964700  |
| C | -4.10054700 | -0.52681300 | 2.25033900  |
| C | -4.76041200 | 0.78525400  | -0.18319800 |
| C | 1.61479200  | 0.67934200  | -2.97302900 |
| C | 0.20872400  | 3.55453200  | -1.38796400 |
| C | 0.44494800  | 3.09112000  | 2.12093400  |
| C | 2.00588800  | -0.03837300 | 2.67125200  |
| C | 2.73025000  | -1.48268700 | -0.46416400 |
| C | -3.78271900 | 0.55696900  | -2.43413600 |
| C | -2.20644700 | -2.63093300 | -2.43377800 |
| C | -1.69892600 | -3.58901300 | 0.95249600  |
| C | -2.98142800 | -1.01253700 | 3.04186500  |
| C | -4.26866000 | 1.55610500  | 0.94670800  |
| C | -2.77852100 | -1.48427300 | -2.97435800 |
| C | -4.17941400 | 1.37184700  | -1.38187900 |
| C | -3.94591500 | 0.91428400  | 2.13702900  |
| C | -2.37852800 | -2.22445800 | 2.72525600  |
| C | -1.65390000 | -3.70272500 | -0.43194700 |
| C | 0.61450800  | 2.72189700  | -2.42666600 |
| C | 2.17471900  | -0.45531800 | -2.43446900 |
| C | 2.92459800  | -1.55165600 | 1.02674400  |
| C | 1.40777200  | 1.17130200  | 3.01792700  |
| C | 0.12260800  | 3.73295600  | 0.93175700  |
| C | 0.24926300  | 0.65176200  | -3.47154500 |

|   |             |             |             |
|---|-------------|-------------|-------------|
| C | -1.19363700 | 3.58435200  | -0.99371400 |
| C | -0.58716800 | 2.38757300  | 2.86590100  |
| C | 1.23199100  | -1.27108800 | 2.73372000  |
| C | 1.73252000  | -2.31956700 | -1.14560900 |
| C | -2.53677400 | 0.83940400  | -3.13677900 |
| C | -0.75701800 | -2.75820100 | -2.37780200 |
| C | -0.50878700 | -3.18446300 | 1.68570800  |
| C | -2.15997300 | 0.12490700  | 3.42764700  |
| C | -3.41225700 | 2.62173000  | 0.44454300  |
| C | -1.92164300 | -0.41713800 | -3.47419200 |
| C | -3.35685800 | 2.50765600  | -0.98909900 |
| C | -2.75505000 | 1.31443300  | 2.87488000  |
| C | -0.92827300 | -2.34644100 | 2.78096800  |
| C | -0.41546500 | -3.41412200 | -1.13968000 |
| C | -0.36686600 | 1.90266600  | -3.12757500 |
| C | 1.40118200  | -1.68216000 | -2.38131000 |
| C | 1.66083000  | -2.12850200 | 1.69248100  |
| C | 0.00494000  | 1.19983800  | 3.41350900  |
| C | -1.24717300 | 3.69762200  | 0.43857200  |
| C | -0.50646300 | -0.55806000 | -3.51356600 |
| C | -2.18501900 | 2.86048600  | -1.71502000 |
| C | -1.95389800 | 2.41116900  | 2.45490200  |
| C | -0.11378400 | -1.28017800 | 3.22745900  |
| C | 0.78724300  | -3.10506500 | -0.44233800 |
| C | -1.75712000 | 1.98963200  | -2.82841500 |
| C | 0.09586900  | -1.77444900 | -2.94418000 |
| C | 0.74322900  | -2.99258800 | 1.04106100  |
| C | -0.74906700 | 0.00342700  | 3.57266700  |
| C | -2.29509800 | 3.09255200  | 1.19092400  |

|   |            |             |             |
|---|------------|-------------|-------------|
| C | 3.55695500 | 0.93416200  | -0.68811600 |
| C | 5.07321700 | 1.19207300  | -1.02957800 |
| H | 5.15798500 | 1.22722700  | -2.12204200 |
| H | 5.32722600 | 2.18930100  | -0.65212200 |
| C | 6.02619500 | 0.16131100  | -0.46269300 |
| C | 6.59777900 | 0.33649700  | 0.81009400  |
| C | 6.35062700 | -0.99701800 | -1.19081700 |
| C | 7.46643200 | -0.62167800 | 1.34375300  |
| H | 6.36404000 | 1.22979800  | 1.38215900  |
| C | 7.21866500 | -1.95721300 | -0.65966400 |
| H | 5.92383700 | -1.14393100 | -2.17856600 |
| C | 7.77781600 | -1.77306200 | 0.61059900  |
| H | 7.90244400 | -0.46704000 | 2.32578700  |
| H | 7.46125900 | -2.84329900 | -1.23795000 |
| H | 8.45453100 | -2.51544500 | 1.02168900  |
| C | 3.01161800 | -0.37939200 | -1.22653500 |
| H | 3.82027600 | -2.13028600 | 1.30071200  |

Total energy = -2938.1212 a.u.

Lowest frequency = 23.6 cm<sup>-1</sup>
